# Supplementary material for: Inequalities in complete childhood immunisation in Nepal: results from a population-based cross-sectional study
Source: PubMed Central journal article supplement — BMJ Open. 2020 Sep 25;10(9):e037646. doi: 10.1136/bmjopen-2020-037646 (PMC7520859; doi:10.1136/bmjopen-2020-037646), 2020-09-25
Supplement: bmjopen-2020-037646.draft_revisions.pdf [file bmjopen-2020-037646.draft_revisions.pdf]

# BMJ Open

BMJ Open is committed to open peer review. As part of this commitment we make the peer review history of every article we publish publicly available.

When an article is published we post the peer reviewers' comments and the authors' responses online. We also post the versions of the paper that were used during peer review. These are the versions that the peer review comments apply to.

The versions of the paper that follow are the versions that were submitted during the peer review process. They are not the versions of record or the final published versions. They should not be cited or distributed as the published version of this manuscript.

BMJ Open is an open access journal and the full, final, typeset and author-corrected version of record of the manuscript is available on our site with no access controls, subscription charges or pay-per-view fees (<http://bmjopen.bmj.com>).

If you have any questions on BMJ Open's open peer review process please email [info.bmjopen@bmj.com](mailto:info.bmjopen@bmj.com)

# BMJ Open

## Determinants of Complete Childhood Immunization in Nepal

|                               |                                                                                                                                                                                                                                                                                                         |
|-------------------------------|---------------------------------------------------------------------------------------------------------------------------------------------------------------------------------------------------------------------------------------------------------------------------------------------------------|
| Journal:                      | <i>BMJ Open</i>                                                                                                                                                                                                                                                                                         |
| Manuscript ID                 | bmjopen-2020-037646                                                                                                                                                                                                                                                                                     |
| Article Type:                 | Original research                                                                                                                                                                                                                                                                                       |
| Date Submitted by the Author: | 12-Feb-2020                                                                                                                                                                                                                                                                                             |
| Complete List of Authors:     | Song, In Han; Yonsei University, Graduate School of Social Welfare; Harvard University T H Chan School of Public Health, Department of Health Policy & Management<br>Palley, Elizabeth; Adelphi University, School of Social Work<br>Atteraya, Madhu; Keimyung University, Department of Social Welfare |
| Keywords:                     | PUBLIC HEALTH, Paediatric infectious disease & immunisation < PAEDIATRICALS, Community child health < PAEDIATRICALS, Child protection < PAEDIATRICALS                                                                                                                                                   |
|                               |                                                                                                                                                                                                                                                                                                         |

SCHOLARONE™  
Manuscripts

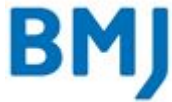

I, the Submitting Author has the right to grant and does grant on behalf of all authors of the Work (as defined in the below author licence), an exclusive licence and/or a non-exclusive licence for contributions from authors who are: i) UK Crown employees; ii) where BMJ has agreed a CC-BY licence shall apply, and/or iii) in accordance with the terms applicable for US Federal Government officers or employees acting as part of their official duties; on a worldwide, perpetual, irrevocable, royalty-free basis to BMJ Publishing Group Ltd ("BMJ") its licensees and where the relevant Journal is co-owned by BMJ to the co-owners of the Journal, to publish the Work in this journal and any other BMJ products and to exploit all rights, as set out in our [licence](#).

The Submitting Author accepts and understands that any supply made under these terms is made by BMJ to the Submitting Author unless you are acting as an employee on behalf of your employer or a postgraduate student of an affiliated institution which is paying any applicable article publishing charge ("APC") for Open Access articles. Where the Submitting Author wishes to make the Work available on an Open Access basis (and intends to pay the relevant APC), the terms of reuse of such Open Access shall be governed by a Creative Commons licence – details of these licences and which [Creative Commons](#) licence will apply to this Work are set out in our licence referred to above.

Other than as permitted in any relevant BMJ Author's Self Archiving Policies, I confirm this Work has not been accepted for publication elsewhere, is not being considered for publication elsewhere and does not duplicate material already published. I confirm all authors consent to publication of this Work and authorise the granting of this licence.

**Title Page****Determinants of Complete Childhood Immunization in Nepal**

In Han Song, PhD

Professor

Graduate School of Social Welfare

Yonsei University, Korea, and

Visiting Scientist,

T.H. Chan School of Public Health

Harvard University, USA

Email: [isong@yonsei.ac.kr](mailto:isong@yonsei.ac.kr)

Elizabeth Palley, PhD

Professor

School of Social Work

Adelphi University, NY, USA

Email: [palley@adelphi.edu](mailto:palley@adelphi.edu)

Madhu Sudhan Atteraya, PhD

Assistant Professor

Department of Social Welfare

Keimyung University, Korea

Phone: +82-53-580-5993

Email: [atteraya@kmu.ac.kr](mailto:atteraya@kmu.ac.kr)

Key words - childhood complete immunization; inequalities; caste/ethnicity; Nepal

Word Count - 2805

Reference Count – 30

Table - 3

## Determinants of Complete Childhood Immunization in Nepal

### Abstract

**Objective** Nepal is a developing country that is struggling to immunize all children fully. Poor immunization rates and the consequent spread of disease are not only national problems but have international implications. As a result, Nepal's immunization challenges have global implications. In the global south, low-income children and children from historically underprivileged families are less likely to be immunized than children from higher-income families. The purpose of the study was to explore associations between social determinants and complete childhood immunization in a low income country, such as Nepal.

**Design** A nationally representative cross-sectional study.

**Setting** Nepal

**Participants** Surviving 12-23 months old children (n=1025).

**Methods** We used the 2016 Nepal Demographic and Health Survey (NDHS), a nationally representative data set. In this study, we examine demographic, economic, and socio-cultural determinants of childhood immunization. We used data from the Child Recode File, and we only analyzed surviving 12-23 months old children (n=1025). A logistic regression analysis was employed to identify the factors that impede or facilitate the complete childhood immunization.

**Results** We found that only 79.2% of children were completely immunized. However, the complete vaccinate rates ranged from 66.4% to 85.2% among caste/ethnic groups, that indicates inequality in childhood immunization based on socially defined characteristics. Furthermore, factors that impede complete childhood immunizations were mother's lower level of education, a larger number of children, and distance to a health facility. Specifically, the result revealed that

1  
2  
3 children from Terai Caste and Muslims were 42% less likely to get complete immunization than  
4  
5 children from High Hindu caste.  
6

7  
8 **Conclusion** Given Nepal's limited resources, we suggest that programs which target the families  
9  
10 of children who are least likely to be fully immunized, specifically those who are not only poor  
11  
12 but in financial crises and "underprivileged" caste families, might be an effective strategy to  
13  
14 improve Nepal's childhood immunization rates.  
15  
16

17  
18 **Keywords:** childhood complete immunization; inequalities; caste/ethnicity; Nepal  
19  
20  
21

### 22 **Strength and limitations of the study**

- 24 ● This study is a representative population-based study, and findings can be generalized to  
25 all sections of the population.  
26  
27
- 28 ● Country-specific factors may impede or facilitate health equity and may contribute to a  
29 country's childhood immunization rates. In this study, we use Nepal as an example  
30 because of its unique and mosaic caste/ethnicity-based social stratification.  
31  
32
- 33 ● Although caste/ethnicity-based social exclusion has been legally abolished,  
34 caste/ethnicity-based sociocultural discrimination is still intact in the Nepalese society.  
35  
36 We examined whether a child's membership in an underprivileged caste/ethnic group  
37 affects the likelihood that the child will be fully immunized.  
38  
39
- 40 ● In Nepal, a child from a disadvantaged caste/ethnic group is less likely to be completely  
41 immunized than other children. This is an important finding as it relates to health equity  
42 in Nepal and may have implications regarding the need to understand social inequities in  
43 a country specific context before developing immunization programs.  
44  
45  
46  
47  
48  
49  
50  
51  
52  
53  
54  
55  
56  
57  
58  
59  
60

- The single limitation of the study is the cross-sectional study design which hinders to make causal relationships among variables.

## Introduction

Nepal is a developing country that is struggling with its efforts to fully immunize children (e.g., a dose of BCG, three doses of DPTs, three doses of oral polios, and a dose of MMR). Slightly more than 20% of all children under 5 are not fully immunized which is consistent with 2018 WHO study results for developing nations.<sup>1</sup> It is well known that childhood immunization reduces infant and child morbidity and mortality rates and can reduce the spread of infectious diseases.<sup>2</sup>

The population of Nepal was estimated to be over 28 million by the end of 2017.<sup>3</sup> Nepal is one of the poorest countries in the world with a Human Development Index of 0.58 ranking 147<sup>th</sup> out of 187 countries with about 35.4% of people living in absolute poverty (on less than \$3.19 (US) per day).<sup>4</sup> In 2011, the average mortality rate in Nepal for children under five was 68 per 1,000, much higher for untouchable caste (Dalits), 90 per 1000.<sup>5</sup> Nepal's poverty as well as its socio-economic and geographical disparities create challenges to increasing its childhood immunization rates.<sup>5</sup>

Based on WHO protocols, children are considered to be fully immunized or have complete immunization after receiving a dose of Bacillus Calmette-Geurin (BCG), three doses of diphtheria-tetanus-pertussis (DPT), three doses of oral polio, and a dose of MMR vaccination to protect them from mumps, measles, rubella, polio, and tetanus.<sup>6</sup> Due to international childhood immunization efforts, infant and child mortality rates have fallen worldwide including those in sub-Saharan Africa and South Asian nations.<sup>7</sup> However, within targeted countries, including

## Childhood Complete Immunization in Nepal

1  
2  
3 Nepal, immunization rates and child mortality rates are unevenly distributed across  
4  
5 subpopulations.<sup>8</sup> In this study, we sought to understand the specific challenges and the factors  
6  
7 that impede or facilitate childhood immunization in Nepal.  
8  
9

10 Previous research has indicated that social exclusion affects access to health care,  
11  
12 exacerbates health inequality, and reduces health care service utilization.<sup>2, 9, 10, 11, 12, 13, 14</sup>  
13

14 Previous research on childhood immunization coverage in South Asia has examined the effect of  
15  
16 a child's gender, his/her family's level of wealth and education, regional inequalities, parental  
17  
18 knowledge and attitudes about immunization, and issues related to mother's empowerment. In  
19  
20 India, numerous studies have demonstrated that individual factors (a child's gender and birth  
21  
22 order), family factors (area of residence, household wealth, and parental education),  
23  
24 demographic factors (religion and caste affiliation), and societal factors (health care access and  
25  
26 community literacy level) are associated with child immunization rates.<sup>2, 12</sup> The majority of  
27  
28 immunization studies in India which relied on surveys conducted by the National Family Health  
29  
30 Survey (NFHS) between 1992/1993 and 2006 suggested that girls were less likely to be  
31  
32 immunized than boys.<sup>15, 16, 17</sup> These studies also reported that children were more likely to be  
33  
34 immunized if their parents had more knowledge about immunization, their mothers had more  
35  
36 education, they were raised in an urban setting, and their families had more money.<sup>18, 19</sup>  
37  
38  
39  
40  
41

42 In Nepal, the majority of research on immunization has emphasized evaluating factors that  
43  
44 affect access to health care as well as the quality of service delivery, including the vaccination  
45  
46 rates.<sup>10</sup> Previous research in Nepal has found that poverty, geographic location (difficult  
47  
48 terrain), low caste or indigenous children, traditional cultural attitudes, being female, and low  
49  
50 levels of maternal education all reduce the likelihood that a child will be immunized.<sup>9, 10, 11, 14</sup>  
51  
52 Specifically, the study<sup>10</sup> revealed that children from indigenous and previously untouchable caste  
53  
54  
55  
56  
57  
58  
59  
60



1  
2  
3 (e.g., *Dalits*) were less likely to be immunized than High caste children; however, the status of  
4 complete immunization among Terai caste and Muslim children were not included in the study  
5 analysis. Indeed, Terai caste and Terai Muslims were the most underprivileged and underserved  
6 communities in the Nepalese social structure.<sup>5</sup> In addition, children are less likely to be fully  
7 immunized if they live far from a health facility.<sup>11</sup> In an attempt to build on this research and  
8 understand current challenges to immunization in Nepal, this study not only explored  
9 demographic information and many of the factors considered above but also examined  
10 geographic, socio-economic, and cultural context and considered social grouping that do not  
11 exist outside of Nepal.  
12  
13  
14  
15  
16  
17  
18  
19  
20  
21  
22  
23  
24  
25

### 26 **Nepal & South Asian Context**

27  
28 Nepal is a multi-lingual, multi-ethnic and multi-religious nation. It has three distinct  
29 geographic regions: the Mountain region, the Hill region, and the Terai region. The Mountain  
30 region includes areas with elevation of 3,000 meters above sea level to Mount Everest (elevation  
31 8,848 meters), the tallest Mountain in the world. The Hill region lies between elevations of 700  
32 and 3,000 meters above sea level, and the Terai region is relatively flat and borders of India.  
33 Different ethnic groups live in each of these geographic regions. For example, the Sherpa ethnic  
34 group lives in the Mountain region and the Tharus in the Terai region. In 2015, according to the  
35 Constitution of Nepal 2015, seven provinces were formed as Province 1, Province 2, Province 3,  
36 Province 4, Province 5, Province 6, and Province 7. The formation of the provinces was based on  
37 the language and caste/ethnic diversity although there is no majority caste/ethnic population in  
38 none of the provinces.  
39  
40  
41  
42  
43  
44  
45  
46  
47  
48  
49  
50  
51  
52

53  
54 Notwithstanding, the abolishment of the caste system in 1990 in Nepal's Constitution, its  
55  
56  
57  
58  
59  
60

1  
2  
3 legacy is apparent and the caste/ethnic-based social structure and hierarchy is still intact. When  
4 we use the term “underprivileged or low caste,” we are talking about the way in which people in  
5 this caste are viewed in the sociocultural context of Nepal and not making a judgment about the  
6 caste ranking or the value of people from these castes. Caste/ethnic affiliation represents one’s  
7 place in the social hierarchy. There are 125 registered caste/ethnic groups in Nepal.<sup>3</sup> One’s caste  
8 is determined by birth. There are four major groupings of castes or *four vernas*: the *Brahmans*  
9 (priests, teachers, and scholars), the *Kshatriyas* (kings and warriors), the *Vaishyas* (traders and  
10 businesspeople, or indigenous people), and the Shudra (untouchables or occupational castes or  
11 *Dalits*).

## 22 **Methods**

### 23 ***Data***

24 We used data from the 2016 Nepal Demographic Health Survey (the 2016 NDHS), a  
25 nationally representative sample of Nepal. The data was collected by the MEASURE  
26 Demographic and Health Survey (DHS) project.<sup>5</sup> The DHS project has collected the most  
27 comprehensive health data available in developing countries, including Nepal. The data is  
28 publicly available through the Ministry of Health and Population of Nepal, New Era Kathmandu,  
29 and ICF International USA. The survey is conducted every five years with support from the US  
30 Agency for International Development (USAID) through its mission in Nepal and was supported  
31 by the Ministry of Health and Population of Nepal. We used data from the Child Recode File and  
32 we only analyzed surviving 12-23 months old children (n=1025). We selected this data because  
33 most children are completely immunized by the age of 24 months.<sup>20</sup>

### 34 ***Dependent Variable coding***

1  
2  
3 As per the WHO recommendation, a child was considered to be fully immunized if s/he  
4 received a BCG vaccine at birth or soon after; three doses each of DPT and polio vaccine at 6,  
5 10, and 14 weeks of age; and the measles vaccine at 9 months or soon thereafter.<sup>21</sup> We  
6 aggregated the values of a BCG vaccine, three DPT and polio vaccines, and a dose of measles.  
7 A value of “1” was assigned for children who received all three vaccines and was considered to  
8 be fully immunized; children who were either unvaccinated or only partially vaccinated were  
9 grouped together and coded as “0”.

### 19 ***Independent variable coding***

21 The individual level covariates included: gender, mother’s educational attainment, family  
22 wealth index, size of the household, mother’s age, birth order rank of a child, and mother’s age at  
23 first birth. These demographic, biological, and socioeconomic characteristics were based on  
24 factors that had been previously shown to be associated with childhood immunization.<sup>9, 10, 22</sup> We  
25 included Nepali specific contextual factors, such as caste/ethnic affiliation, ecological and  
26 regional location of residence (urban/rural and provinces). We also included the variables in the  
27 analysis such as distance to a health facility and immediate financial situation (e.g. money as a  
28 big problem to visit health care service).

### 39 ***Data Analyses***

41 The statistical analyses were performed using the software SPSS for Windows (version  
42 25). We first ran descriptive and bivariate statistical analyses. To identify factors that are  
43 significantly associated with complete childhood immunization, we ran multivariate logistic  
44 regressions. To determine the statistical significance, we used a p-value less than 0.05.

### 51 ***Patient and Public Involvement statement***

53 Patients and the public were not involved in the research.

## Childhood Complete Immunization in Nepal

## Results

Overall, 72.9% of the children were fully immunized while 98% of children had received a BCG vaccination, 88.6 % received full doses of Polio vaccines, 87.4% received total doses of DPT vaccines, and nearly 91% of the children had their measles vaccine.

**Table 1. Childhood Immunization by the Vaccine Type**

| Percentage vaccinated                        |               |                      |                   |                   |                       |
|----------------------------------------------|---------------|----------------------|-------------------|-------------------|-----------------------|
|                                              | A BCG vaccine | Three Polio vaccines | Three DPT vaccine | A Measles vaccine | Complete Immunization |
| <i>Total</i>                                 | <i>97.7</i>   | <i>88.6</i>          | <i>87.4</i>       | <i>91.2</i>       | <i>79.2</i>           |
| Gender                                       |               |                      |                   |                   |                       |
| Male                                         | 98.2          | 88.4                 | 86.5              | 91.1              | 78.1                  |
| Female                                       | 96.9          | 88.8                 | 88.6              | 91.4              | 80.6                  |
| Caste/Ethnic Affiliation                     |               |                      |                   |                   |                       |
| High Hindu Caste                             | 99.7          | 91.1                 | 92.5              | 96.1              | 85.2                  |
| Previously Untouchables                      | 97.0          | 88.1                 | 87.5              | 88.6              | 74.9                  |
| Indigenous                                   | 97.5          | 90.4                 | 89.8              | 95.0              | 84.8                  |
| Terai Caste, Muslims                         | 95.6          | 83.0                 | 77.3              | 81.2              | 66.4                  |
| Mother's Education                           |               |                      |                   |                   |                       |
| None                                         | 96.7          | 84.4                 | 83.8              | 84.1              | 70.8                  |
| Primary education                            | 97.1          | 89.4                 | 87.0              | 91.3              | 77.3                  |
| Secondary Education                          | 98.4          | 89.4                 | 88.3              | 94.7              | 82.4                  |
| Higher Education                             | 98.6          | 94.3                 | 93.6              | 97.1              | 91.4                  |
| Wealth Status                                |               |                      |                   |                   |                       |
| Poor                                         | 97.5          | 87.2                 | 88.0              | 91.9              | 78.7                  |
| Middle                                       | 97.8          | 86.5                 | 83.4              | 86.5              | 74.0                  |
| Rich                                         | 97.8          | 92.1                 | 89.3              | 93.4              | 83.6                  |
| Ecological Region                            |               |                      |                   |                   |                       |
| Mountain                                     | 98.9          | 80.5                 | 85.1              | 94.3              | 72.4                  |
| Hill                                         | 98.8          | 92.5                 | 93.2              | 96.0              | 86.5                  |
| Terai                                        | 96.5          | 86.4                 | 82.9              | 86.6              | 74.2                  |
| Place of Residence                           |               |                      |                   |                   |                       |
| Urban                                        | 97.8          | 89.1                 | 87.0              | 91.1              | 79.3                  |
| Rural                                        | 97.5          | 88.0                 | 88.0              | 91.2              | 79.0                  |
| Provinces                                    |               |                      |                   |                   |                       |
| Province 1                                   | 97.2          | 85.1                 | 85.8              | 96.5              | 79.4                  |
| Province 2                                   | 96.0          | 82.5                 | 77.8              | 80.8              | 65.7                  |
| Province 3                                   | 98.1          | 92.5                 | 92.5              | 95.3              | 86.0                  |
| Province 4                                   | 100           | 96.7                 | 94.3              | 97.6              | 91.9                  |
| Province 5                                   | 98.3          | 96.1                 | 90.4              | 87.0              | 79.7                  |
| Province 6                                   | 97.9          | 86.1                 | 84.7              | 94.4              | 77.1                  |
| Province 7                                   | 97.0          | 89.6                 | 91.8              | 94.0              | 83.6                  |
| Money needed to visit a health care facility |               |                      |                   |                   |                       |
| Not a big problem                            | 98.6          | 91.1                 | 93.5              | 96.2              | 86.8                  |
| Big problem                                  | 97.0          | 86.9                 | 83.3              | 87.8              | 74.0                  |
| Distance to health facility                  |               |                      |                   |                   |                       |

|                   |      |      |      |      |      |
|-------------------|------|------|------|------|------|
| Not a big problem | 98.2 | 92.0 | 91.3 | 94.9 | 84.6 |
| Big problem       | 97.3 | 86.5 | 95.1 | 86.0 | 75.9 |

Table 2 presents the descriptive characteristics of the sample and the bivariate association between independent and dependent variables. Fifty-six percent of the children were boys and 44% girls. Almost 30% of the children were from high caste Hindus, 16.4 % from the previously untouchable caste, 31.5 % from indigenous community, and 22.3 % were from the Terai caste and Muslims. Nearly 30% of mothers never had any formal schooling. Results from bivariate analyses showed that variables such as caste/ethnic affiliation, mother's education, wealth status, ecological region, provinces, number of living children, money to pay to get to a health care facility and distance to health care facilities were significantly associated with complete childhood immunization. We also found that only 66% of Terai Caste and Muslim children were fully immunized whereas 82.5% of high caste Hindu children were fully immunized. Similarly, 71% of children whose mothers were illiterate were fully immunized whereas 91.4% of children whose mothers had some college or higher level of education were fully immunized.

**Table 2.** Descriptive Characteristics of the Sample and Bivariate Association between Independent Variables and Complete Childhood Immunization (N=1025)

|                               | All Population |      | Completely Immunized |      |
|-------------------------------|----------------|------|----------------------|------|
|                               | Number         | (%)  | yes (n)              | %    |
| Gender of a child             |                |      |                      |      |
| Male                          | 570            | 55.6 | 145                  | 78.1 |
| Female                        | 455            | 44.4 | 366                  | 80.6 |
| Caste/Ethnic Affiliation **** |                |      |                      |      |
| High Hindu Caste              | 305            | 29.8 | 260                  | 82.5 |
| Previously Untouchables       | 168            | 16.4 | 125                  | 74.9 |
| Indigenous                    | 232            | 31.5 | 274                  | 84.8 |
| Terai Caste, Muslims          | 299            | 22.3 | 152                  | 66.4 |
| Mother's Education ****       |                |      |                      |      |
| None                          | 302            | 29.5 | 213                  | 70.8 |
| Primary Education             | 207            | 20.2 | 160                  | 77.3 |
| Secondary Education           | 376            | 36.7 | 310                  | 82.4 |
| Higher Education              | 140            | 13.7 | 128                  | 91.4 |
| Wealth Status **              |                |      |                      |      |
| Poor                          | 484            | 42.7 | 318                  | 78.7 |
| Middle                        | 223            | 21.8 | 165                  | 74.0 |

## Childhood Complete Immunization in Nepal

|                                       |            |      |            |      |
|---------------------------------------|------------|------|------------|------|
| Rich                                  | 318        | 31.0 | 265        | 83.6 |
| Ecological Region ****                |            |      |            |      |
| Mountain                              | 87         | 8.5  | 63         | 72.4 |
| Hill                                  | 429        | 41.9 | 371        | 86.5 |
| Terai                                 | 509        | 49.7 | 377        | 74.2 |
| Place of Residence                    |            |      |            |      |
| Urban                                 | 585        | 57.1 | 464        | 79.3 |
| Rural                                 | 440        | 42.9 | 347        | 79.0 |
| Provinces ****                        |            |      |            |      |
| Province 1                            | 141        | 13.8 | 112        | 79.4 |
| Province 2                            | 198        | 19.3 | 130        | 65.7 |
| Province 3                            | 107        | 10.4 | 92         | 86.0 |
| Province 4                            | 123        | 12.0 | 113        | 91.9 |
| Province 5                            | 178        | 17.4 | 141        | 79.7 |
| Province 6                            | 144        | 14.0 | 111        | 77.1 |
| Province 7                            | 134        | 13.1 | 112        | 83.6 |
| Size of household (Mean; SD)          | 6.27; 3.01 |      | 6.31;3.00  |      |
| Mother's age (Mean; SD)               | 25.15;5.32 |      | 25.09;5.27 |      |
| No. of living children (Mean; SD)**** | 2.14; 1.40 |      | 2.05;1.36  |      |
| Money needed to visit ****            |            |      |            |      |
| Not a big problem                     | 416        | 40.6 | 361        | 86.8 |
| Big problem                           | 609        | 59.4 | 450        | 74.0 |
| Distance to health facility ****      |            |      |            |      |
| Not a big problem                     | 389        | 38.0 | 329        | 84.6 |
| Big problem                           | 636        | 62.0 | 482        | 75.9 |

\*p ≤ .10. \*\*p ≤ .05. \*\*\*p ≤ .01. \*\*\*\*p ≤ .001.

Results from multivariate analysis showed that children from Terai Caste and Muslim were 42% (OR=0.58, CI = 0.30 – 1.09, p=.090) less likely to get complete immunization than children from High Hindu caste. At the same time children whose mothers had higher education were 92% (OR=1.92, CI = .92 – 4.05, p=.083) more likely to get complete immunization than children of a mother with no formal education. Similarly, children from the Hill region were more likely to be completely immunized than children from Mountain region (OR = 2.32, CI = 1.26 – 4.27, p = .006). We found that the larger the number of children in a household, the less likely the children were to be completely immunized. Lastly, mothers who needed money to visit health care facilities were less likely to immunize their children (OR = .67, CI = .44 – 1.01, p = .055).

**Table 3. Logistic Regression Analysis for Complete Immunization in Nepal.**

| Variables                   | Complete immunization |             |
|-----------------------------|-----------------------|-------------|
|                             | OR                    | 95% CI      |
| Gender of a child           |                       |             |
| Male (ref.)                 | 1.00                  |             |
| Female                      | 1.13                  | .82 – 1.53  |
| Caste/Ethnic Affiliation    |                       |             |
| High Hindu Caste (ref.)     | 1.00                  |             |
| Untouchables                | .67                   | .38 – 1.59  |
| Indigenous                  | 1.03                  | .62 – 1.72  |
| Terai Caste, Muslims *      | .58                   | .30 - 1.09  |
| Mother's Education          |                       |             |
| None (ref.)                 | 1.00                  |             |
| Primary education           | 1.07                  | .68 – 1.68  |
| Secondary Education         | 1.06                  | .67 - 1.68  |
| Higher Education *          | 1.92                  | .92 – 4.05  |
| Wealth Status               |                       |             |
| Poor (ref.)                 | 1.00                  |             |
| Middle                      | .93                   | .60 – 1.45  |
| Rich                        | 1.14                  | .71 – 1.83  |
| Ecological Region           |                       |             |
| Mountain (ref.)             | 1.00                  |             |
| Hill **                     | 2.35                  | 1.27 – 4.33 |
| Terai                       | 1.44                  | .71 - 2.95  |
| Place of Residence          |                       |             |
| Urban (ref.)                | 1.00                  |             |
| Rural                       | 1.193                 | .85 – 1.66  |
| Provinces                   |                       |             |
| Province 3 (ref.)           | 1.00                  |             |
| Province 1                  | .83                   | .39 – 1.75  |
| Province 2                  | .77                   | .33 - 1.77  |
| Province 4                  | 1.56                  | .65 - 1.78  |
| Province 5                  | .87                   | .40 – 1.90  |
| Province 6                  | .64                   | .31 – 1.34  |
| Province 7                  | 1.32                  | .60 – 2.93  |
| Size of household           | 1.04                  | .98 – 1.10  |
| Mother's age                | 1.02                  | .98 – 1.06  |
| No. of living children *    | .86                   | .73 – 1.01  |
| Money needed to visit       |                       |             |
| Not a big problem           | 1.00                  |             |
| Big problem *               | .67                   | .44 – 1.01  |
| Distance to health facility |                       |             |
| Not a big problem           | 1.00                  |             |
| Big problem                 | .78                   | .53 – 1.20  |
| Overall model $\chi^2$      | 88.43                 |             |
| Cox & Snell R <sup>2</sup>  | .083                  |             |
| -2 LL                       | 958.915               |             |

\*p ≤ .10. \*\*p ≤ .05. \*\*\*p ≤ .01. \*\*\*\*p ≤ .001.

## Discussion

Article 20 of the United Nations Convention on the Rights of the Child (UNCRC) declares that no child should be left behind or deprived of his or her rights to access health care, including the right to be fully immunized.<sup>23</sup> In line with the UNCRC, Nepal began offering free vaccines in an effort to fully immunize its children but has been unable to do so. Despite high level (90%) of measles immunization of one-year-old children, many children are not immunized against diphtheria, tetanus, and pertussis by age two.<sup>24</sup> The government of Nepal has sought to increase the childhood vaccination rates. In order to ensure that the country can successfully implement programs designed to increase childhood vaccination rates, it is essential to understand who is not being vaccinated. We highlight some of the key findings of this study.

The findings of this analysis are generally consistent with previous research and indicate that mother's educational status, the number of children in a family, and family financial problems (acute poverty; e.g. the money to visit health facility) as well as belonging to low or underprivileged caste status are all related to the likelihood that a child will or will not be immunized. The intersectional effect of poverty, educational deprivation, and belonging to socially excluded caste/ethnic groups impacts the inability to complete childhood immunizations by age 2 even though the childhood vaccines discussed in this paper are free. This finding is consistent with the case of India where children from similar vulnerable intersectional groups are also less likely to be fully immunized.<sup>12</sup>

Caste and ethnic group affiliation also affected the likelihood that a child would be fully immunized. Children from the Terai caste (66%) were less likely to be immunized than children from Hindu caste (82.5%). Although caste-based discrimination was legally abolished, people from the Terai caste (Madhesi and Muslim) are the least privileged cultural group in Nepal and



1  
2  
3 are the least likely to be educated than people in other castes. The impact of the socio-economic  
4 deprivation on other health and social outcomes for Terai women in Nepal has been well  
5 documented.<sup>25, 26</sup>  
6  
7

8  
9  
10 Consistent with previous research<sup>12</sup>, higher levels of maternal education were significantly  
11 correlated with higher child vaccination rates. This study found that nearly 30% of mothers in  
12 Nepal lacked any formal education. Among this group, only 70.8 percent of children were fully  
13 vaccinated. Among the children born to the most highly educated mothers (13.7% of the  
14 children in the survey), 91.4 percent were fully vaccinated. As a result, the findings of this study  
15 suggest that strengthening education for girls, particularly those from underprivileged castes,  
16 most of whom will presumably become mothers, might be correlated with an increase in Nepal's  
17 child immunization rates.  
18  
19  
20  
21  
22  
23  
24  
25  
26  
27

28 Children in families with many children were less likely to be fully immunized. This finding  
29 is consistent with findings from previous research which has indicated that families with more  
30 children in developing countries are less likely to be able to provide them access to health care.  
31  
32  
33  
34  
35  
36  
37  
38  
39  
40  
41  
42  
43  
44  
45  
46  
47  
48  
49  
50  
51  
52  
53  
54  
55  
56  
57  
58  
59  
60

27, 28 Therefore, the finding of the study reinforce the need for family planning programs to  
reduce the number of children born into Nepali families, particularly those families that are  
already vulnerable to low vaccination rates. In addition, the findings suggest that immunization  
campaigns should target households with many children.

Acute poverty (e.g., families which lack the money needed to visit a health care facility even  
when the health care itself is free) is a significant barrier for complete immunization.

Interestingly, household wealth status itself was not a statistically significant predictor for  
childhood immunization. This is likely because the WHO has provided free vaccines in Nepal  
since the inception of the Expanded Program on Immunization (EPI) in 1979.<sup>29</sup> This suggests

1  
2  
3 that progress has been made in equality in vaccine delivery, availability, and use throughout  
4  
5 Nepal. Nevertheless, mothers who reported 'money as a big problem' to visit health care  
6  
7 facilities were less likely to fully immunize their children. Nepal currently provides some  
8  
9 financial incentives to mothers who deliver babies in hospitals or health centers. We recommend  
10  
11 that this program be expanded to offer financial incentives to mothers who fully immunize their  
12  
13 children in an effort to further reduce financial barriers to immunization.  
14  
15

16  
17 We found that there are no gender differences in complete childhood immunization. This  
18  
19 finding is inconsistent with the previous studies that were conducted in South Asian context,  
20  
21 especially India<sup>15, 16, 17</sup> However, there is a sex ratio imbalance in the overall population; 44% of  
22  
23 children were girls, and 56% were boys. This indicates the male preference in Nepalese societies  
24  
25 and the possibility of sex-selective abortion.<sup>30</sup>  
26  
27

### 28 **Strengths and limitations**

29

30  
31 The strength of the study is that it used a nationally representative sample. Therefore, the  
32  
33 findings are robust and can be generalized nationwide. The results should be helpful when  
34  
35 devising national policies. Despite this, the study has some limitations. It used cross-sectional  
36  
37 data and relied on the validity of mother's answers to questions about vaccine utilization. Some  
38  
39 mothers may have been unaware of different doses of vaccines that their children received. Some  
40  
41 additional limitations are that there was no assessment of the service delivery systems, there may  
42  
43 be personal and cultural barriers that affected the collection of the data, and there was no  
44  
45 assessment of the communication between parents and health care service providers in the  
46  
47 survey. Finally, the survey excluded data on children who may have been vaccinated when they  
48  
49 were over 23 months old, the typical time at which these vaccines have been provided.  
50  
51  
52  
53  
54  
55  
56  
57  
58  
59  
60

## Conclusions

Each country has their own issues that limit access to health and welfare services. In Nepal, we found that children belonging to the underprivileged caste/ethnic groups and those whose mothers reported being in a financial crisis situation (e.g., money is a big problem to visit health care facility) were the least likely to be fully immunized. Based on the findings, more systematic vaccination programs could be designed to specifically target socially excluded children (children from underprivileged castes). As noted above, we suggest an increase use of family planning, more expansive education for girls, and programs that enable children to be vaccinated in their own communities so that they do not have to travel to health clinics as well as financial subsidies for travelling to health clinics. These strategies would likely improve Nepal's immunization rates.

## Acknowledgment

- a. Contributorship statement: Participating authors equally contributed.
- b. Competing interests: None declared.
- c. Funding: This work was supported by the BK21 plus program through the National Research Foundation (NRF) funded by the Ministry of Education of Korea
- d. Data sharing statement: Data are available upon request.

## References

1. World Health Organization, WHO. Immunization Coverage: Key Facts, 2008. Retrieved from: <http://www.who.int/news-room/fact-sheets/detail/immunization-coverage>

## Childhood Complete Immunization in Nepal

- 1  
2  
3 2. Kc A, Nelin V, Raaijmakers H., Kim HJ, Singh C, Målqvist M. Increased immunization  
4 coverage addresses the equity gap in Nepal. *Bull. World Health Organ* 2017; **95**(4): 261-  
5  
6 269  
7  
8
- 9  
10 3. Central Bureau of Statistics, CBS. *Nepal in Figure 2018, 2018*. Retrieved from  
11  
12 <http://cbs.gov.np/image/data/2018/Nepal%20in%20Figures%202018.pdf>  
13
- 14 4. United National Development Reports. Human Development Report 2019, 2019.  
15 Retrieved from <http://hdr.undp.org/en>  
16
- 17 5. Ministry of Health and Population (MOHP) [Nepal], New ERA, and ICF International  
18 Inc. Nepal Demographic and Health Survey 2011. Kathmandu, Nepal: Ministry of Health  
19 and Population, New ERA, and ICF International, Calverton, Maryland, 2012.  
20  
21  
22  
23  
24  
25
- 26 6. Jamison DT, Breman JG, Measham AR., Alleyne G, Claeson M, Evans DB, ...  
27 Musgrove P. (Eds.). *Disease control priorities in developing countries*. The World Bank,  
28 2006.  
29  
30  
31  
32
- 33 7. Liu L, Oza S, Hogan D, Perin J, Rudan I, Lawn JE, ... Black RE. Global, regional, and  
34 national causes of child mortality in 2000–13, with projections to inform post-2015  
35 priorities: an updated systematic analysis. *Lancet*, 2015; **385**(9966): 430-440.  
36  
37  
38  
39
- 40 8. Sartorius BK, Sartorius K. Global infant mortality trends and attributable determinants–  
41 an ecological study using data from 192 countries for the period 1990–2011. *Popul*  
42 *Health Metr*, 2014; **12**(1): 29.  
43  
44  
45  
46
- 47 9. Bhandari P, Shrestha SS, Ghimire DJ. Sociocultural and geographical disparities in child  
48 immunization in Nepal. *Asia Pac Popul J*, 2007; **22**(1): 43.  
49  
50
- 51 10. Devkota S, Butler C. Caste-ethnic disparity in vaccine use among 0-to 5-year-old  
52 children in Nepal: a decomposition analysis. *Int J Public Health*, 2016; **61**(6): 693-699.  
53  
54  
55  
56  
57  
58  
59  
60

11. Devkota S, Panda B. Childhood immunization and access to health care: evidence from Nepal. *Asia Pac J Public Health*, 2016; **28**(2): 167-177.
12. Joe W. Intersectional inequalities in immunization in India, 1992–93 to 2005–06: a progress assessment. *Health Policy Plann*, 2014; **30**(4): 407-422.
13. Marmot M. Social determinants of health inequalities. *Lancet*, 2005; **365**(9464): 1099-1104.
14. Pandey S, Lee H N. Determinants of child immunization in Nepal: The role of women's empowerment. *Health Educ J*, 2012; **71**(6): 642-653.
15. Corsi DJ, Bassani DG, Kumar R, Awasthi S, Jotkar R, Kaur N, Jha P. Gender inequity and age-appropriate immunization coverage in India from 1992 to 2006. *BMC Int Health Hum Rights*, 2009; **9**(1): S3.
16. Prusty RK, Kumar A. Socioeconomic dynamics of gender disparity in childhood immunization in India, 1992–2006. *PloS One*, 2014; **9**(8): e104598.
17. Singh PK. Trends in child immunization across geographical regions in India: focus on urban-rural and gender differentials. *PloS One*, 2013; **8**(9): e73102.
18. Jheeta M, Newell J. Childhood vaccination in Africa and Asia: the effects of parents' knowledge and attitudes. *Bull World Health Organ*, 2008; **86**: 419-419A.
19. Subhani S, Yaseen R, Khan MA, Jeelani G, Fatima R. Impact of mother's education on child immunization: a comparative study of India and Pakistan. *IJFE* 2015; **3**: 51Á4.
20. Anand S, Bärnighausen T. Health workers and vaccination coverage in developing countries: an econometric analysis. *Lancet*, 2007; **369**(9569), 1277-1285.

21. World Health Organization, WHO. *Immunization in Practice: A Guide for Health Workers Who Give Vaccines. Module I: Vaccines and When to Give Them*. Geneva: Department of Vaccines and Biologicals, World Health Organization, 1984.
22. Bugvi AS, Rahat R, Zakar R, Zakar MZ, Fischer F, Nasrullah M, Manawar R. Factors associated with non-utilization of child immunization in Pakistan: evidence from the Demographic and Health Survey 2006-07. *BMC Public Health*, 2014; **14**(1): 232.
23. Office of the United Nations High Commissioner for Human Rights, OHCHR. *Convention on the Rights of the Child*, Adopted and opened for signature, ratification and accession by General Assembly resolution 44/25 of 20 November 1989 entry into force 2 September 1990, in accordance with article 49, n. d.
24. World Health Organization. WHO. World Immunization Week in Nepal: An anniversary of remembrance, 2016. Retrieved from <https://www.who.int/news-room/feature-stories/detail/world-immunization-week-in-nepal-an-anniversary-of-remembrance>
25. Atteraya MS, Gnawali S, Song IH. Factors associated with intimate partner violence against married women in Nepal. *J Interpers Violence*, 2015; **30**(7), 1226-1246.
26. Atteraya MS, Kimm H, Song IH. Women's autonomy in negotiating safer sex to prevent HIV: findings from the 2011 Nepal demographic and health survey. *AIDS Educ Prev*, 2014; **26**(1), 1-12.
27. Mishra K, Kumar P, Basu S, Rai K, Aneja S. Risk factors for severe acute malnutrition in children below 5 y of age in India: a case-control study. *Indian J Pediatr*, 2014; **81**(8): 762-765.
28. Singh L, Rai RK, Singh PK. Assessing the utilization of maternal and child health care among married adolescent women: evidence from India. *J Biosoc Sci*, 2012; **44**(1): 1-26.

1  
2  
3 29. World Health Organization, WHO. The Expanded Programme on Immunization, 2013.  
4

5 Retrieved from

6  
7 [http://www.who.int/immunization/programmes\\_systems/supply\\_chain/benefits\\_of\\_immunization/en/](http://www.who.int/immunization/programmes_systems/supply_chain/benefits_of_immunization/en/)  
8  
9  
10

11  
12 30. Lamichhane P, Harken T, Puri M, Darney PD, Blum M, Harper CC, Henderson JT. Sex-  
13  
14 selective abortion in Nepal: a qualitative study of health workers' perspectives. *Women's*  
15  
16 *Health Issues*, 2011; **21**(3): S37-S41.  
17  
18  
19  
20  
21  
22  
23  
24  
25  
26  
27  
28  
29  
30  
31  
32  
33  
34  
35  
36  
37  
38  
39  
40  
41  
42  
43  
44  
45  
46  
47  
48  
49  
50  
51  
52  
53  
54  
55  
56  
57  
58  
59  
60

# BMJ Open

## Inequalities in Complete Childhood Immunization in Nepal: Results from the 2016 Nepal Demographic and Health Survey (the 2016 NDHS)

|                                 |                                                                                                                                                                                                                                                                                                         |
|---------------------------------|---------------------------------------------------------------------------------------------------------------------------------------------------------------------------------------------------------------------------------------------------------------------------------------------------------|
| Journal:                        | <i>BMJ Open</i>                                                                                                                                                                                                                                                                                         |
| Manuscript ID                   | bmjopen-2020-037646.R1                                                                                                                                                                                                                                                                                  |
| Article Type:                   | Original research                                                                                                                                                                                                                                                                                       |
| Date Submitted by the Author:   | 17-Jun-2020                                                                                                                                                                                                                                                                                             |
| Complete List of Authors:       | Song, In Han; Yonsei University, Graduate School of Social Welfare; Harvard University T H Chan School of Public Health, Department of Health Policy & Management<br>Palley, Elizabeth; Adelphi University, School of Social Work<br>Atteraya, Madhu; Keimyung University, Department of Social Welfare |
| <b>Primary Subject Heading</b>: | Global health                                                                                                                                                                                                                                                                                           |
| Secondary Subject Heading:      | Global health, Immunology (including allergy)                                                                                                                                                                                                                                                           |
| Keywords:                       | PUBLIC HEALTH, Paediatric infectious disease & immunisation < PAEDIATRICALS, Community child health < PAEDIATRICALS, Child protection < PAEDIATRICALS                                                                                                                                                   |
|                                 |                                                                                                                                                                                                                                                                                                         |

SCHOLARONE™  
Manuscripts





I, the Submitting Author has the right to grant and does grant on behalf of all authors of the Work (as defined in the below author licence), an exclusive licence and/or a non-exclusive licence for contributions from authors who are: i) UK Crown employees; ii) where BMJ has agreed a CC-BY licence shall apply, and/or iii) in accordance with the terms applicable for US Federal Government officers or employees acting as part of their official duties; on a worldwide, perpetual, irrevocable, royalty-free basis to BMJ Publishing Group Ltd ("BMJ") its licensees and where the relevant Journal is co-owned by BMJ to the co-owners of the Journal, to publish the Work in this journal and any other BMJ products and to exploit all rights, as set out in our [licence](#).

The Submitting Author accepts and understands that any supply made under these terms is made by BMJ to the Submitting Author unless you are acting as an employee on behalf of your employer or a postgraduate student of an affiliated institution which is paying any applicable article publishing charge ("APC") for Open Access articles. Where the Submitting Author wishes to make the Work available on an Open Access basis (and intends to pay the relevant APC), the terms of reuse of such Open Access shall be governed by a Creative Commons licence – details of these licences and which [Creative Commons](#) licence will apply to this Work are set out in our licence referred to above.

Other than as permitted in any relevant BMJ Author's Self Archiving Policies, I confirm this Work has not been accepted for publication elsewhere, is not being considered for publication elsewhere and does not duplicate material already published. I confirm all authors consent to publication of this Work and authorise the granting of this licence.

**Title Page****Inequalities in Complete Childhood Immunization in Nepal: Results from the 2016 Nepal Demographic and Health Survey (the 2016 NDHS)**

In Han Song, PhD  
Professor & Visiting Scientist  
Yonsei University, Korea & Harvard University, USA  
Department of Social Welfare & T.H. Chan School of Public Health  
Email: [isong@yonsei.ac.kr](mailto:isong@yonsei.ac.kr)

Elizabeth Palley, PhD  
Professor  
School of Social Work  
Adelphi University, NY, USA  
Email: [palley@adelphi.edu](mailto:palley@adelphi.edu)

Madhu Sudhan Atteraya, PhD  
Assistant Professor  
Department of Social Welfare  
Keimyung University, Korea  
Phone: +82-53-580-5993  
Email: [atteraya@kmu.ac.kr](mailto:atteraya@kmu.ac.kr)

Key words - childhood complete immunization; inequalities; caste/ethnicity; Nepal

Word Count - 3126

Reference Count - 29

## Inequalities in Complete Childhood Immunization in Nepal: Results from the 2016 Nepal Demographic and Health Survey (the 2016 NDHS)

### Abstract

**Objective** To investigate the effect of different aspects of inequality on childhood immunization rates in Nepal.

**Design** A population-based cross-sectional study

**Setting** This study used the 2016 Nepal Demographic and Health Survey

**Participants** A total of 1025 children ages 12 to 23 months old

**Outcome measures** The main outcome variable was childhood immunization

**Results** Only 79.2% of children were fully immunized. The complete vaccination rate of ethnic/caste subpopulations ranged from 66.4% to 85.2%. Social inequalities factors such as children belonging underprivileged caste/ethnic groups as well as living in acute poverty were predictors for complete childhood vaccine utilization.

**Conclusion** Given Nepal's limited resources, we suggest that programs which target the families of children who are least likely to be fully immunized, specifically those who are not only poor but in financial crises and "underprivileged" caste families, might be an effective strategy to improve Nepal's childhood immunization rates.

**Keywords:** childhood complete immunization; inequalities; caste/ethnicity; Nepal

### Strengths and limitations of this study

- The study used a nationally representative sample, and the findings are robust and generalize nationwide.

## Childhood Complete Immunization in Nepal

- The results are useful to help inform national policies for childhood immunization in Nepal
- The study used cross-sectional data and relied on the validity of the mother's answers to questions about vaccine utilization since some mothers may have been unaware of different doses of vaccines that their children received
- The study excluded data on children who may have been vaccinated when they were over 23 months old.
- There may have been communication issues between parents and health care service providers in the survey as well as personal and cultural barriers that affect the collection of the data.

## Introduction

Full immunization coverage is one of the important agendas for sustainable development goal (SDG 3). However, almost 20 million children under 5 are still not be fully immunized. This is a particular problem in low income nations such as Nepal.<sup>1</sup> Full immunization for young children is an instrumental variable for child health and wellbeing which helps reduce infant and child morbidity and mortality rates as well as prevents the spread of infectious diseases.<sup>2,3</sup>

Based on WHO protocols, children are considered to be fully immunized or have complete immunization after receiving a dose of Bacillus Calmette-Geurin (BCG), three doses of diphtheria-tetanus-pertussis (DPT), three doses of oral polio, and a dose of MMR vaccination to protect them from mumps, measles, rubella, polio, and tetanus.<sup>4</sup> Due to international childhood immunization efforts, infant and child mortality rates have fallen throughout the world including in sub-Saharan Africa and South Asia.<sup>5</sup> However, within targeted countries, including Nepal,

1  
2  
3 immunization rates and child mortality rates are unevenly distributed across subpopulations.<sup>3</sup> In  
4  
5 this study, we sought to understand the specific challenges and the factors that impede or  
6  
7 facilitate childhood immunization in Nepal.  
8  
9

10 Previous research has indicated that social exclusion affects access to health care,  
11  
12 exacerbates health inequality, and reduces health care service utilization.<sup>2, 3, 6, 7, 8, 9, 10</sup> Previous  
13  
14 research on childhood immunization coverage in South Asia has examined the effect of a child's  
15  
16 gender, his/her family's level of wealth and education, regional inequalities, parental knowledge  
17  
18 and attitudes about immunization, and issues related to mother's empowerment. In South Asia,  
19  
20 numerous studies have demonstrated that individual factors (a child's gender), family factors  
21  
22 (area of residence, household wealth, and parental education), demographic factors (religion and  
23  
24 caste affiliation), and societal factors (health care access and community literacy level) are  
25  
26 associated with child immunization rates.<sup>2, 3, 6, 7, 8, 9, 10</sup> The majority of immunization studies in  
27  
28 India have relied on surveys conducted by the National Family Health Survey (NFHS) between  
29  
30 1992/1993 and 2006 suggested that girls were less likely to be immunized than boys.<sup>11, 12, 13</sup>  
31  
32 These studies also reported that children were more likely to be immunized if their parents had  
33  
34 more knowledge about immunization, their mothers had more education, they were raised in an  
35  
36 urban setting, and their families had more money.<sup>14, 15</sup>  
37  
38  
39  
40  
41

42 In Nepal, the majority of research on immunization has emphasized evaluating factors that  
43  
44 affect access to health care as well as the quality of service delivery, including the vaccination  
45  
46 rates.<sup>6</sup> Previous research in Nepal has found that poverty, geographic location (difficult terrain),  
47  
48 being from a low caste or indigenous population, traditional cultural attitudes, being female, and  
49  
50 low levels of maternal education all reduce the likelihood that a child will be immunized.<sup>2, 6, 7, 10</sup>  
51  
52 Previous research<sup>6</sup> found that children from indigenous and previously untouchable caste (e.g.,  
53  
54  
55  
56  
57  
58  
59  
60

1  
2  
3 *Dalits*) were less likely to be immunized than High caste children. Terai caste and Muslim  
4 children were not included in the study analysis. Indeed, Terai caste and Terai Muslims are the  
5 most underprivileged and under representative communities in the Nepalese social structure.<sup>16, 17,</sup>  
6  
7 In an attempt to build on this research and understand current challenges to immunization in  
8 Nepal, this study not only explored demographic information and many of the factors considered  
9  
10 above but also examined structural barrier factors that do not exist outside of Nepal.  
11  
12  
13  
14  
15  
16  
17  
18

## 19 **Methods**

### 20 ***Data***

21  
22 We used data from the 2016 Nepal Demographic Health Survey (the 2016 NDHS), a  
23 nationally representative sample of Nepal. The data was collected by the MEASURE  
24 Demographic and Health Survey (DHS) project.<sup>16</sup> The DHS project has collected the most  
25 comprehensive health data available in developing countries, including Nepal. The data is  
26 publicly available through the Ministry of Health and Population of Nepal, New Era Kathmandu,  
27 and ICF International USA. The survey is conducted every five years with support from the US  
28 Agency for International Development (USAID) through its mission in Nepal and was supported  
29 by the Ministry of Health and Population of Nepal. We used data from the Children's Data  
30 Section (i.e., Child Recode File) of the Nepal Demographic Health Survey the 2016 NDHS. The  
31 data provides health information on every child who was born in the five years preceding the  
32 survey. The survey also provides information about children who received specific vaccine  
33 based on vaccination card and/or mother's report. We only analyzed data for children from 12-23  
34 months (n=1025). We selected this data because most children are completely immunized by the  
35 age of 24 months.<sup>18</sup>  
36  
37  
38  
39  
40  
41  
42  
43  
44  
45  
46  
47  
48  
49  
50  
51  
52  
53  
54  
55  
56  
57  
58  
59  
60

### ***Dependent Variable***

As per the WHO recommendation, a child was considered to be fully immunized if s/he received a BCG vaccine at birth or soon after; three doses each of DPT and polio vaccine at 6, 10, and 14 weeks of age; and the measles vaccine at 9 months or soon thereafter.<sup>19</sup> We aggregated the values of a BCG vaccine, three DPT and polio vaccines, and a dose of measles. A value of “1” was assigned for children who received all three vaccines and was considered to be fully immunized; children who were either unvaccinated or only partially vaccinated were grouped together and coded as “0.” Similarly, those children who received complete doses of DPT and polio vaccines were coded as 1 and those who were unvaccinated or only partially vaccinated for DPT and polio were coded as “0.” Those who received a measles vaccine were coded as 1 and all other values were coded as 0. In further analysis, we did not consider BGG vaccination because almost 98% children were BCG vaccinated.

### ***Independent variable coding***

The individual level covariates included: gender of the child, age of the mother, mother’s educational attainment, family wealth index, mother’s age, and number of living children under the age of five. These demographic, biological, and socioeconomic characteristics were based on factors that had been previously shown to be associated with childhood immunization.<sup>3, 6, 8, 11, 14, 15, 20</sup> We included Nepali specific contextual factors, such as caste/ethnic affiliation, ecological and regional location of residence (urban/rural and provinces). Other variables (e.g., structural barrier factors for health care service utilization) we considered were distance to a health facility and immediate financial situation (e.g. money as a big problem to visit health care service, and distance to health care facility).

## Childhood Complete Immunization in Nepal

1  
2  
3 All independent variables in the study were categorical variable, except the number of  
4 children under the age of five. A boy was coded as “1” and a girl was coded as “2”. The NDHS  
5 provides mother age groups in 5 year interval (15-49). We recoded creating a mother’s age group  
6 into 4 categories as 15 to 19, 20 to 29, 30 to 39, and 40 to 49.  
7  
8  
9  
10  
11

12 There are 125 registered caste/ethnic groups in Nepal and one’s caste/ethnicity is determined  
13 by birth. Within such heterogeneity of caste/ethnic groupings, the NDHS provides 11 different  
14 categories of caste/ethnicity affiliation, which we further grouped into four categories based on  
15 previous studies<sup>21</sup> as high Hindu caste, previously untouchable caste (e.g., Dalits), indigenous  
16 (Newars and Janajati), and other Terai caste (i.e., Madeshi and Muslims). The NDHS provides  
17 mother’s educational attainment as illiterate, primary school attainment, secondary school  
18 attainment, and higher education attainment. We recoded again and coded as “0” for those  
19 mother who have never attended any schooling, “1” for primary education completion, and “2”  
20 was coded for secondary and higher education attainment. The NDHS provides 5 categories of  
21 wealth index based on household’s cumulative living standard and it was recoded as poorest,  
22 poor, middle, rich, and richest. .  
23  
24  
25  
26  
27  
28  
29  
30  
31  
32  
33  
34  
35  
36  
37

38 Nepal has three distinct geographical regions (Mountain, Hill, and Terai) and we coded  
39 geographical regions into three categories. The Mountain region includes areas with elevation of  
40 3,000 meters above sea level to Mount Everest (elevation 8,848 meters), the tallest Mountain in  
41 the world. The Hill region lies between elevations of 700 and 3,000 meters above sea level, and  
42 the Terai region is relatively flat and borders of India. Similarly, cities and towns were grouped  
43 into urban area which were coded as “1”; villages were grouped under the rural area which were  
44 coded as “2”.  
45  
46  
47  
48  
49  
50  
51  
52  
53

54 In 2015, according to the Constitution of Nepal 2015, seven provinces were formed as  
55  
56  
57  
58  
59  
60



Province 1, Province 2, Province 3, Province 4, Province 5, Province 6, and Province 7. The formation of the provinces was based on the language and caste/ethnic diversity, although there is no majority caste/ethnic population in any of these provinces. These provinces were coded as categories variable: Province 1, Province 2, Province 3, Province 4, Province 5, Province 6, and Province 7. We also included two factors that we predicted would be structural barriers to accessing vaccines; affordability (money was reported to be as big problem) and accessibility (distance to health facility). Those who responded that money was not a big problem were coded as “0” and those who responded that money was a big problem were coded as “1”. Similarly, those who reported distance to health care facility was not a big problem was recoded as “0” and those who responded “big problem” was coded as “1”.

### ***Data Analyses***

The statistical analyses were performed using the software SPSS for Windows (version 25). We first ran descriptive and bivariate statistical analyses. To identify factors that are significantly associated with complete childhood immunization, we ran multivariate logistic regressions. Variables which were significant in our univariate analyses were included in the multivariate logistic regression analyses. To determine the statistical significance, we used a p-value less than 0.05.

### ***Ethical Approval***

For the 2016 Nepal Demographic Health Survey (the 2016 NDHS), ethical approval was obtained from the Nepal Health Research Council, Kathmandu, Nepal, and ICF Macro Institutional Review Board, Maryland, USA.

### ***Patient and Public Involvement statement***

Patients and the public were not involved in the research.

## Childhood Complete Immunization in Nepal

## Results

Overall, 79.2% of the children were fully immunized while 97.7% of children had received a BCG vaccination, 88.6 % received full doses of Polio vaccines, 87.4% received total doses of DPT vaccines, and nearly 91% of the children had their measles vaccine (Table 1).

**Table 1. Childhood Immunization by the Vaccine Type**

| Vaccination              | A BCG vaccine | Three Polio vaccines | Three DPT vaccine | A Measles vaccine | Complete Immunization |
|--------------------------|---------------|----------------------|-------------------|-------------------|-----------------------|
| % vaccinated             | 97.7          | 88.6                 | 87.4              | 91.1              | 79.2                  |
| Gender of the child      |               |                      |                   |                   |                       |
| Male                     | 98.2          | 88.4                 | 86.5              | 91.1              | 78.1                  |
| Female                   | 96.9          | 88.8                 | 88.6              | 91.4              | 80.6                  |
| Age of the mother        |               |                      |                   |                   |                       |
| 15 - 19                  | 98.3          | 89.3                 | 86.0              | 94.2              | 80.2                  |
| 20 - 29                  | 97.9          | 88.6                 | 87.5              | 90.4              | 79.0                  |
| 30 - 39                  | 96.5          | 88.3                 | 87.7              | 93.6              | 80.1                  |
| 40 - 49                  | 95.2          | 85.7                 | 90.5              | 81.0              | 71.4                  |
| Caste/Ethnic Affiliation |               |                      |                   |                   |                       |
| High Hindu Caste         | 99.7          | 91.1                 | 92.5              | 96.1              | 85.2                  |
| Previously Untouchables  | 97.0          | 88.1                 | 87.5              | 88.6              | 74.9                  |
| Indigenous               | 97.5          | 90.4                 | 89.8              | 95.0              | 84.8                  |
| Terai Caste, Muslims     | 95.6          | 83.0                 | 77.3              | 81.2              | 66.4                  |
| Mother's Education       |               |                      |                   |                   |                       |
| None                     | 96.7          | 84.4                 | 83.8              | 84.1              | 70.8                  |
| Primary                  | 97.1          | 89.4                 | 87.0              | 91.3              | 77.3                  |
| Secondary & Higher       | 98.4          | 90.7                 | 89.7              | 95.3              | 84.9                  |
| Wealth Status            |               |                      |                   |                   |                       |
| Poorest                  | 98.0          | 85.8                 | 88.2              | 92.5              | 77.6                  |
| Poor                     | 97.0          | 88.7                 | 87.8              | 91.3              | 80.0                  |
| Middle                   | 97.8          | 86.5                 | 83.4              | 86.5              | 74.0                  |
| Richer                   | 98.6          | 93.3                 | 89.0              | 94.7              | 84.6                  |
| Richest                  | 96.3          | 89.9                 | 89.9              | 90.8              | 81.7                  |
| Ecological Region        |               |                      |                   |                   |                       |
| Mountain                 | 98.9          | 80.5                 | 85.1              | 94.3              | 72.4                  |
| Hill                     | 98.8          | 92.5                 | 93.2              | 96.0              | 86.5                  |
| Terai                    | 96.5          | 86.4                 | 82.9              | 86.6              | 74.2                  |
| Place of Residence       |               |                      |                   |                   |                       |
| Urban                    | 97.8          | 89.1                 | 87.0              | 91.1              | 79.3                  |
| Rural                    | 97.5          | 88.0                 | 88.0              | 91.2              | 79.0                  |
| Provinces                |               |                      |                   |                   |                       |
| Province 1               | 97.2          | 85.1                 | 85.8              | 96.5              | 79.4                  |
| Province 2               | 96.0          | 82.5                 | 77.8              | 80.8              | 65.7                  |

## Childhood Complete Immunization in Nepal

|                                              |      |      |      |      |      |
|----------------------------------------------|------|------|------|------|------|
| Province 3                                   | 98.1 | 92.5 | 92.5 | 95.3 | 86.0 |
| Province 4                                   | 100  | 96.7 | 94.3 | 97.6 | 91.9 |
| Province 5                                   | 98.3 | 96.1 | 90.4 | 87.0 | 79.7 |
| Province 6                                   | 97.9 | 86.1 | 84.7 | 94.4 | 77.1 |
| Province 7                                   | 97.0 | 89.6 | 91.8 | 94.0 | 83.6 |
| Money needed to visit a health care facility |      |      |      |      |      |
| Not a big problem                            | 98.6 | 91.1 | 93.5 | 96.2 | 86.8 |
| Big problem                                  | 97.0 | 86.9 | 83.3 | 87.8 | 74.0 |
| Distance to health facility                  |      |      |      |      |      |
| Not a big problem                            | 98.2 | 92.0 | 91.3 | 94.9 | 84.6 |
| Big problem                                  | 97.3 | 86.5 | 95.1 | 86.0 | 75.9 |

Note: SD = Standard Deviation

Table 2 presents the descriptive characteristics of the sample and the bivariate association between independent and dependent variables. Fifty-six percent of the children were boys and 44% girls. Almost 30% of the children were from high Hindu caste families, 16.4 % were from the previously untouchable caste, 31.5 % were from indigenous families, and 22.3 % were from the Terai caste or were Muslim. Nearly 30% of mothers never had any formal schooling. Results from bivariate analyses indicated that caste/ethnic affiliation, mother's education, wealth status, ecological region, provinces, number of children under five, money to pay to get to a health care facility, and distance to health care facilities were significantly associated with complete childhood immunization. We also found that only 66.4% of Terai Caste and Muslim children were fully immunized whereas 82.5% of high Hindu caste children were fully immunized. Similarly, 65.7 % of children who live in Province 2 were fully immunized whereas almost 92% of children living in province 4 were fully immunized. (Table 2).

## Childhood Complete Immunization in Nepal

**Table 2.** Descriptive Characteristics of the Sample and Bivariate Association between Independent Variables and Complete Childhood Immunization (N=1025)

| Variables                | All Population |      | Three Polio vaccines |      | Three DPT vaccines |      | A Measles vaccine |      | Completely Immunized |      |
|--------------------------|----------------|------|----------------------|------|--------------------|------|-------------------|------|----------------------|------|
|                          | N.             | (%)  | yes (N)              | %    | yes (N)            | %    | yes (N)           | %    | yes (N)              | %    |
| Gender of the child      |                |      |                      |      |                    |      |                   |      |                      |      |
| Male                     | 570            | 55.6 | 504                  | 88.4 | 493                | 86.5 | 519               | 91.1 | 145                  | 78.1 |
| Female                   | 455            | 44.4 | 404                  | 88.8 | 403                | 88.6 | 415               | 91.4 | 366                  | 80.6 |
| Age of the mother        |                |      |                      |      |                    |      |                   |      |                      |      |
| 25 – 19                  | 121            | 11.8 | 108                  | 89.3 | 104                | 86.0 | 114               | 94.2 | 97                   | 80.2 |
| 20 - 29                  | 712            | 69.5 | 631                  | 88.6 | 623                | 87.5 | 643               | 90.4 | 562                  | 79.0 |
| 30 - 39                  | 171            | 16.7 | 151                  | 88.3 | 150                | 87.7 | 160               | 93.6 | 137                  | 80.1 |
| 40 – 49                  | 21             | 2.0  | 18                   | 85.7 | 19                 | 90.5 | 17                | 81.0 | 15                   | 71.4 |
| Caste/Ethnic Affiliation |                |      | **                   |      | ****               |      | ****              |      | ****                 |      |
| High Hindu Caste         | 305            | 29.8 | 278                  | 91.1 | 282                | 92.5 | 293               | 96.1 | 260                  | 82.5 |
| Previously Untouchables  | 168            | 16.4 | 148                  | 88.1 | 147                | 87.5 | 148               | 88.6 | 125                  | 74.9 |
| Indigenous               | 232            | 31.5 | 292                  | 90.4 | 290                | 89.8 | 307               | 95.0 | 274                  | 84.8 |
| Terai Caste, Muslims     | 299            | 22.3 | 190                  | 83.0 | 177                | 77.3 | 186               | 81.2 | 152                  | 66.4 |
| Mother's Education       |                |      | **                   |      | **                 |      | ****              |      | ****                 |      |
| None                     | 302            | 29.5 | 255                  | 84.4 | 253                | 83.9 | 253               | 84.1 | 213                  | 70.8 |
| Primary Education        | 207            | 20.2 | 185                  | 89.4 | 180                | 87.0 | 189               | 91.3 | 160                  | 77.3 |
| Secondary & Higher       | 516            | 50.3 | 468                  | 90.7 | 463                | 89.7 | 492               | 95.3 | 438                  | 84.9 |
| Wealth Status            |                |      |                      |      |                    |      | **                |      | *                    |      |
| Poorest                  | 254            | 24.8 | 218                  | 85.8 | 224                | 88.2 | 235               | 92.5 | 197                  | 77.6 |
| Poor                     | 230            | 22.4 | 204                  | 88.7 | 202                | 87.8 | 210               | 91.3 | 184                  | 80.0 |
| Middle                   | 223            | 21.8 | 193                  | 86.5 | 186                | 83.4 | 193               | 86.5 | 165                  | 74.0 |
| Richer                   | 209            | 20.4 | 195                  | 93.3 | 186                | 89.0 | 197               | 94.7 | 176                  | 84.6 |
| Richest                  | 109            | 10.6 | 98                   | 89.9 | 98                 | 89.9 | 99                | 90.8 | 89                   | 81.7 |
| Ecological Region        |                |      | ****                 |      | ****               |      | ****              |      | ****                 |      |
| Mountain                 | 87             | 8.5  | 70                   | 80.5 | 74                 | 85.1 | 82                | 94.3 | 63                   | 72.4 |
| Hill                     | 429            | 41.9 | 398                  | 92.8 | 400                | 93.2 | 412               | 96.0 | 371                  | 86.5 |
| Terai                    | 509            | 49.7 | 440                  | 86.4 | 422                | 82.9 | 440               | 86.6 | 377                  | 74.2 |
| Place of Residence       |                |      |                      |      |                    |      |                   |      |                      |      |
| Urban                    | 585            | 57.1 | 521                  | 89.1 | 509                | 87.0 | 533               | 91.1 | 464                  | 79.3 |
| Rural                    | 440            | 42.9 | 387                  | 88.0 | 387                | 88.0 | 401               | 91.3 | 347                  | 79.0 |
| Provinces                |                |      | ***                  |      | ****               |      | ****              |      | ****                 |      |
| Province 1               | 141            | 13.8 | 120                  | 85.1 | 121                | 85.8 | 136               | 96.5 | 112                  | 79.4 |

Childhood Complete Immunization in Nepal

1  
2  
3  
4  
5  
6  
7  
8  
9  
10  
11  
12  
13  
14  
15  
16  
17  
18  
19  
20  
21  
22  
23  
24  
25  
26  
27  
28  
29  
30  
31  
32  
33  
34  
35  
36  
37  
38  
39  
40  
41  
42  
43  
44  
45  
46  
47

|                                    |               |      |               |      |                  |      |                   |      |                   |      |
|------------------------------------|---------------|------|---------------|------|------------------|------|-------------------|------|-------------------|------|
| Province 2                         | 198           | 19.3 | 163           | 82.3 | 154              | 77.8 | 160               | 80.8 | 130               | 65.7 |
| Province 3                         | 107           | 10.4 | 99            | 92.5 | 99               | 92.5 | 102               | 95.3 | 92                | 86.0 |
| Province 4                         | 123           | 12.0 | 119           | 96.7 | 116              | 94.3 | 120               | 97.6 | 113               | 91.9 |
| Province 5                         | 178           | 17.4 | 163           | 91.6 | 161              | 90.4 | 154               | 87.0 | 141               | 79.7 |
| Province 6                         | 144           | 14.0 | 124           | 86.1 | 122              | 84.7 | 136               | 94.4 | 111               | 77.1 |
| Province 7                         | 134           | 13.1 | 120           | 89.6 | 123              | 91.8 | 126               | 94.0 | 112               | 83.6 |
| Number of children under 5 (M; SD) | 1.61;<br>.902 |      | 2.12;<br>1.38 |      | 2.10;<br>1.38*** |      | 2.09;<br>1.38**** |      | 2.05;<br>1.36**** |      |
| Money needed to visit              |               |      | **            |      | ****             |      | ****              |      | ****              |      |
| Not a big problem                  | 416           | 40.6 | 379           | 91.1 | 389              | 93.5 | 400               | 96.2 | 361               | 86.8 |
| Big problem                        | 609           | 59.4 | 529           | 98.9 | 507              | 83.3 | 534               | 87.8 | 450               | 74.0 |
| Distance to health facility        |               |      | **            |      | ***              |      | ***               |      | ****              |      |
| Not a big problem                  | 389           | 38.0 | 358           | 92.0 | 355              | 91.3 | 369               | 94.9 | 329               | 84.6 |
| Big problem                        | 636           | 62.0 | 550           | 86.5 | 541              | 85.1 | 565               | 89.0 | 482               | 75.9 |

Note: N. = Number  
 \*p ≤ .10. \*\*p ≤ .05. \*\*\*p ≤ .01. \*\*\*\*p ≤ .001.

For peer review only

## Childhood Complete Immunization in Nepal

1  
2  
3 Results from the multivariate analysis showed that children from the previously untouchable  
4 caste (OR = .58; CI = .33 – .99) and the Terai caste (OR=0.54; CI = .29 – .99) were less likely to  
5 be fully immunized than children from the high Hindu caste. Similarly, children from the Terai  
6  
7  
8  
9  
10  
11  
12  
13  
14  
15  
16  
17  
18  
19  
20  
21  
22  
23  
24  
25  
26  
27  
28  
29  
30  
31  
32  
33  
34  
35  
36  
37  
38  
39  
40  
41  
42  
43  
44  
45  
46  
47  
48  
49  
50  
51  
52  
53  
54  
55  
56  
57  
58  
59  
60

Children living in Hill region were more likely to be fully immunized and more likely to get complete doses of polio vaccines and DPT vaccines than children living in Mountain region. Although statistical significance was weaker, more abundant wealth status was correlated with a child's likelihood of being vaccinated, such as a total dose of polio, a measles vaccine, and overall full immunization. Similarly, children from mothers reporting immediate financial problems (e.g., money is a big problem) were less likely to be fully immunized, including a complete dose of DPT and measles, than their counterpart (See Table 3).

Childhood Complete Immunization in Nepal

Table 3. Logistic Regression Analysis for Complete Immunization in Nepal.

| Variables                   | Three Polio vaccines |             | Three DPT vaccines |             | A Measles vaccine |             | Complete immunization |             |
|-----------------------------|----------------------|-------------|--------------------|-------------|-------------------|-------------|-----------------------|-------------|
|                             | OR                   | 95% CI      | OR                 | 95% CI      | OR                | 95% CI      | OR                    | 95% CI      |
| Caste/Ethnic Affiliation    |                      |             |                    |             |                   |             |                       |             |
| High Hindu Caste (ref.)     | 1.00                 |             | 1.00               |             | 1.00              |             | 1.00                  |             |
| Untouchables                | .61                  | .30 – 1.24  | .57                | .28 – 1.17  | .54               | .22 – 1.30  | .58**                 | .33 - .99   |
| Indigenous                  | .79                  | .42 – 1.48  | .72                | .38 – 1.39  | .96               | .40 – 2.34  | .96                   | .58 – 1.59  |
| Terai Caste, Muslims        | .48*                 | .22 – 1.05  | .36**              | .16 - .79   | .56               | .22 – 1.44  | .54**                 | .29 - .99   |
| Mother’s Education          |                      |             |                    |             |                   |             |                       |             |
| None (ref.)                 | 1.00                 |             | 1.00               |             | 1.00              |             | 1.00                  |             |
| Primary                     | 1.24                 | .70 – 2.19  | .95                | .55 – 1.62  | 1.77*             | .96 – 3.28  | 1.13                  | .73 – 1.75  |
| Secondary & Higher          | 1.07                 | .64 – 1.81  | .78                | .47 – 1.30  | 1.95**            | 1.04 – 3.63 | 1.23                  | .81 – 1.86  |
| Wealth Status               |                      |             |                    |             |                   |             |                       |             |
| Poorest (ref.)              | 1.00                 |             | 1.00               |             | 1.00              |             | 1.00                  |             |
| Poor                        | 1.56                 | .84 – 2.90  | 1.14               | .60 – 2.16  | 1.45              | .65 – 3.21  | 1.32                  | .80 – 2.18  |
| Middle                      | 1.54                 | .78 – 3.05  | 1.06               | .53 – 2.08  | 1.12              | .49 – 2.54  | 1.16                  | .67 – 2.00  |
| Richer                      | 2.70*                | 1.20 – 6.09 | 1.25               | .59 – 2.62  | 2.44*             | .93 – 6.39  | 1.71*                 | .93 – 3.15  |
| Richest                     | 1.44                 | .57 – 3.58  | 1.19               | .48 – 2.99  | 1.03              | .36 – 2.94  | 1.19                  | .57 – 2.45  |
| Ecological Region           |                      |             |                    |             |                   |             |                       |             |
| Mountain (ref.)             | 1.00                 |             | 1.00               |             | 1.00              |             | 1.00                  |             |
| Hill                        | 2.51**               | 1.23 – 5.09 | 2.72**             | 1.24 – 5.99 | 1.25              | .41 – 3.76  | 2.14**                | 1.17 – 3.90 |
| Terai                       | 1.32                 | .56 – 3.07  | .76                | .31 – 1.88  | .58               | .16 – 2.10  | 1.27                  | .62 – 2.60  |
| Provinces                   |                      |             |                    |             |                   |             |                       |             |
| Province 3 (ref.)           | 1.00                 |             | 1.00               |             | 1.00              |             | 1.00                  |             |
| Province 1                  | .57                  | .22 – 1.43  | .99                | .38 – 2.59  | 2.04              | .51 – 8.15  | .83                   | .39 – 1.73  |
| Province2                   | .67                  | .23 – 1.94  | 1.31               | .45 – 3.74  | .72               | .20 – 2.64  | .75                   | .32 – 1.72  |
| Province 4                  | 1.95                 | .55 – 6.90  | 1.15               | .38 – 3.43  | 1.66              | .37 – 7.49  | 1.62                  | .67 – 3.89  |
| Province 5                  | 1.10                 | .39 – 3.05  | 2.02               | .71 – 5.78  | .54               | .16 – 1.84  | .91                   | .42 – 1.98  |
| Province 6                  | .55                  | .21 – 1.40  | .39*               | .15 – 1.09  | 1.02              | .29 – 3.56  | .65                   | .31 – 1.36  |
| Province 7                  | .94                  | .34 – 2.54  | 1.67               | .59 – 4.74  | 1.28              | .36 – 4.55  | 1.26                  | .57 – 2.77  |
| Number of children under 5  | 1.15                 | .92 – 1.43  | .98                | .80 – 1.19  | .97               | .78 – 1.21  | .96                   | .81 – 1.44  |
| Money needed to visit       |                      |             |                    |             |                   |             |                       |             |
| Not a big problem           | 1.00                 |             | 1.00               |             | 1.00              |             | 1.00                  |             |
| Big problem *               | 1.14                 | .69 – 1.88  | .47***             | .28 - .81   | .55*              | .28 – 1.09  | .66**                 | .44 – 1.00  |
| Distance to health facility |                      |             |                    |             |                   |             |                       |             |

## Childhood Complete Immunization in Nepal

|                        |         |            |         |            |         |            |         |            |
|------------------------|---------|------------|---------|------------|---------|------------|---------|------------|
| Not a big problem      | 1.00    |            | 1.00    |            | 1.00    |            | 1.00    |            |
| Big problem            | .65     | .39 – 1.09 | .81     | .49 – 1.32 | .63     | .34 – 1.18 | .81     | .54 – 1.22 |
| Overall model $\chi^2$ | 48.856  |            | 71.466  |            | 85.663  |            | 80.948  |            |
| Cox & Snell $R^2$      | .047    |            | .067    |            | .080    |            | .076    |            |
| -2 LL                  | 679.093 |            | 704.311 |            | 525.883 |            | 966.205 |            |

\* $p \leq .10$ . \*\* $p \leq .05$ . \*\*\* $p \leq .01$ . \*\*\*\* $p \leq .001$ .

For peer review only



## Discussion

Article 20 of the United Nations Convention on the Rights of the Child (UNCRC) declares that no child should be left behind or deprived of his or her rights to access health care, including the right to be fully immunized.<sup>22</sup> In line with the UNCRC, Nepal began offering free vaccines to vaccinate its children fully. Despite the progress on immunization of one-year-old children, complete childhood immunization has still remained a challenge in Nepal.<sup>23</sup>

The government of Nepal has committed to achieve UN Sustainable Development Goal (Goal 3) and sought to increase the childhood vaccination rates through its National Immunization Program (NIP) by providing childhood immunization to all sections of the population. In order to ensure that Nepal can successfully implement programs designed to increase childhood vaccination rates, it is essential to understand who is and who is not being vaccinated. We highlight some of the key findings of this study.

The findings of this analysis are consistent with previous research and indicate that family financial problems (acute poverty; e.g. the money to visit health facility) as well as being a member of a low or underprivileged caste all affect the likelihood that a child will or will not be immunized. The fact is that Nepal is one of the lowest income countries in the world with a Human Development Index of 0.58 ranking 147<sup>th</sup> out of 187 countries with about 35.4% of people living in absolute poverty (on less than \$3.19 (US) per day).<sup>24</sup> In 2011, the average mortality rate in Nepal for children under five was 68 per 1,000, much higher for previously untouchable caste (Dalits), 90 per 1000.<sup>16</sup> The finding of the study further supports the Nepal's socio-economic and geographical disparities create challenges to increasing its childhood immunization rates. Despite access to free vaccines throughout the country, intersection of acute

1  
2  
3 poverty and belonging to socially excluded caste/ethnic groups still makes it less likely to be  
4  
5 fully vaccinated by age 2.  
6

7  
8 Notwithstanding, the abolishment of the caste system in 1990 in Nepal's Constitution, its  
9  
10 legacy is apparent and the caste/ethnic-based social structure and hierarchy is still intact.  
11  
12 Previous studies have documented that the caste/ethnicity based social exclusion is deeply rooted  
13  
14 in Nepalese social structure, specifically people belonging to the untouchable caste as well as  
15  
16 belonging to Terai caste (including Madeshi and Muslims) face broad-based discrimination and  
17  
18 are socially excluded from the power structures in society.<sup>17</sup> As consequences of such social  
19  
20 exclusion, they are more likely to experience other forms of disadvantages such as living in  
21  
22 poverty and exposure of domestic violence.<sup>25</sup> Consistent with this social context, children  
23  
24 belonging to previously untouchable and Terai caste are less likely to be fully immunized than  
25  
26 other children.  
27  
28  
29

30  
31 Interestingly, household wealth status itself was not a strong statistically significant predictor  
32  
33 for childhood immunization. However, acute poverty (e.g., families which lack the money  
34  
35 needed to visit a health care facility) is a significant barrier for complete immunization. This is  
36  
37 likely because the government has provided free vaccines in Nepal since the inception of the  
38  
39 Expanded Program on Immunization (EPI) in 1979.<sup>27</sup> This suggests that though in many places  
40  
41 in Nepal vaccines are readily available in health care centers, acute poverty affects some  
42  
43 women's ability to access to these health care centers. Mothers who reported 'money as a big  
44  
45 problem' to visit health care facilities were less likely to fully immunize their children. Nepal  
46  
47 currently provides some financial incentives to mothers who give birth in hospitals or health  
48  
49 centers. We recommend that this program be expanded to offer financial incentives to mothers  
50  
51 who immunize their children in an effort to further reduce financial barriers to immunization.  
52  
53  
54  
55  
56  
57  
58  
59  
60

1  
2  
3 We found that there are no gender differences between children who were fully immunized  
4 in Nepal. This finding is inconsistent with the previous studies that were conducted in South  
5 Asian context, especially India<sup>11, 12, 13</sup> However, there is a sex ratio imbalance in the overall  
6 population; 44% of children were girls, and 56% were boys. This indicates the male preference  
7 in Nepalese societies and the possibility of sex-selective abortion.<sup>28</sup> Interestingly, this sex  
8 preference does not seem to have influenced childhood immunization rates in Nepal. Further  
9 inquiry is needed to understand why.

10  
11 We found that children living in the Hill region were more likely to be fully vaccinated than  
12 other subpopulations. The people in the Hill region belong to the top and the bottom of the caste  
13 system, and they brought the tradition of caste-based social structure. Such tradition of social  
14 groupings included the Brahmans (priests, teachers, and scholars), the Kshatriyas (kings and  
15 warriors), the Vaishyas (traders and businesspeople, or indigenous people), and the Shudra  
16 (untouchables or occupational castes or Dalits). The majority of people who live in the Hill  
17 region are from high Hindu caste backgrounds, and this population has a more significant  
18 influence on linguistic, socio-political, and cultural aspects in Nepal.<sup>29</sup>

### 19 20 21 22 23 24 25 26 27 28 29 30 31 32 33 34 35 36 37 38 39 40 41 42 43 44 45 46 47 48 49 50 51 52 53 54 55 56 57 58 59 60

**Recommendations**

The study explored social inequalities in Nepal, such as belonging to the underprivileged caste/ethnic group, living in acute poverty, and geographical disparities predicted to impede or facilitate childhood immunization for Nepalese children. Based on the study findings, we recommend that it is essential to reduce deep-rooted social inequalities in order to effectively deliver essential social and health services, including childhood immunization. One way to do this is to improve social inclusion and to provide welfare programs, particularly for socially underprivileged caste/ethnic populations. We also recommend providing financial incentives to

families that immunize their children. Such practices would support UN SDG 3, Article 20 of the United Nations Convention on the Rights, and Rights to Health Care which is also mandated by Article 35 of the 2015 Nepalese Constitution.

## Conclusions

Each country has their own issues that limit access to health and welfare services. In Nepal, we found that children belonging to the underprivileged caste/ethnic groups and those whose mothers reported being in a financial crisis situation (e.g., money is a big problem to visit health care facility) were the least likely to be fully immunized. We recommend working to reduce deep seated social inequalities in Nepal that are correlated with children being less likely to be vaccinated. Nepal needs to do more than legislate to end the caste system (which has been done) but also needs to enforce such legislation. Another way to improve access to childhood vaccines would be to increase educational opportunities for girls. Lastly, and perhaps the most easily accomplished, more systematic vaccination programs such as community based education and financial incentives to vaccinate children could be designed to specifically target socially excluded children.

## Acknowledgment

- a. Contributorship statement: All authors have substantially contributed to this manuscript. IHS designed the manuscript, MSA prepared the dataset and conducted the statistical analysis under the supervision of IHS and EP. MSA prepared the initial draft of the paper. IHS and EP revised the paper and contributed to preparing the final draft for the submission.
- b. Competing interests: None declared.
- c. Funding: None.

- d. Data sharing statement: Data are available upon request.

## References

1. UNICEF and WHO. Progress and Challenges with Achieving Universal Immunization Coverage, 2019. Retrieved from:  
[https://www.who.int/immunization/monitoring\\_surveillance/who-immuniz.pdf?ua=1](https://www.who.int/immunization/monitoring_surveillance/who-immuniz.pdf?ua=1)
2. Kc A, Nelin V, Raaijmakers H., Kim HJ, Singh C, Målqvist M. Increased immunization coverage addresses the equity gap in Nepal. *Bull. World Health Organ* 2017; **95**(4): 261-269
3. Bhandari P, Shrestha SS, Ghimire DJ. Sociocultural and geographical disparities in child immunization in Nepal. *Asia Pac Popul J*, 2007; **22**(1): 43.
4. Jamison DT, Breman JG, Measham AR., Alleyne G, Claeson M, Evans DB, ... Musgrove P. (Eds.). *Disease control priorities in developing countries*. The World Bank, 2006.
5. Liu L, Oza S, Hogan D, Perin J, Rudan I, Lawn JE, ... Black RE. Global, regional, and national causes of child mortality in 2000–13, with projections to inform post-2015 priorities: an updated systematic analysis. *Lancet*, 2015; **385**(9966): 430-440.
6. Devkota S, Butler C. Caste-ethnic disparity in vaccine use among 0-to 5-year-old children in Nepal: a decomposition analysis. *Int J Public Health*, 2016; **61**(6): 693-699.
7. Devkota S, Panda B. Childhood immunization and access to health care: evidence from Nepal. *Asia Pac J Public Health*, 2016; **28**(2): 167-177.
8. Joe W. Intersectional inequalities in immunization in India, 1992–93 to 2005–06: a progress assessment. *Health Policy Plann*, 2014; **30**(4): 407-422.

- 1  
2  
3 9. Marmot M. Social determinants of health inequalities. *Lancet*, 2005; **365**(9464): 1099-  
4  
5 1104.  
6
- 7  
8 10. Pandey S, Lee H N. Determinants of child immunization in Nepal: The role of women's  
9  
10 empowerment. *Health Educ J*, 2012; **71**(6): 642-653.  
11
- 12 11. Corsi DJ, Bassani DG, Kumar R, Awasthi S, Jotkar R, Kaur N, Jha P. Gender inequity  
13  
14 and age-appropriate immunization coverage in India from 1992 to 2006. *BMC Int Health*  
15  
16 *Hum Rights*, 2009; **9**(1): S3.  
17
- 18  
19 12. Prusty RK, Kumar A. Socioeconomic dynamics of gender disparity in childhood  
20  
21 immunization in India, 1992–2006. *PloS One*, 2014; **9**(8): e104598.  
22
- 23  
24 13. Singh PK. Trends in child immunization across geographical regions in India: focus on  
25  
26 urban-rural and gender differentials. *PloS One*, 2013; **8**(9): e73102.  
27
- 28  
29 14. Jheeta M, Newell J. Childhood vaccination in Africa and Asia: the effects of parents'  
30  
31 knowledge and attitudes. *Bull World Health Organ*, 2008; **86**: 419-419A.  
32
- 33  
34 15. Subhani S, Yaseen R, Khan MA, Jeelani G, Fatima R. Impact of mother's education on  
35  
36 child immunization: a comparative study of India and Pakistan. *IJFE* 2015; **3**: 51Á4.  
37
- 38  
39 16. Ministry of Health and Population (MOHP) [Nepal], New ERA, and ICF International  
40  
41 Inc. Nepal Demographic and Health Survey 2011. Kathmandu, Nepal: Ministry of Health  
42  
43 and Population, New ERA, and ICF International, Calverton, Maryland, 2012.  
44
- 45  
46 17. Dahal DR. The'Madhsi'People: Issues and Challenges of Democracy in the Nepal Terai.  
47  
48 *Local democracy in south Asia: Microprocesses of democratization in Nepal and its*  
49  
50 *neighbours, 1*, 128, 2008  
51
- 52  
53 18. Anand S, Bärnighausen T. Health workers and vaccination coverage in developing  
54  
55 countries: an econometric analysis. *Lancet*, 2007; **369**(9569), 1277-1285.  
56  
57

- 1  
2  
3  
4  
5  
6  
7  
8  
9  
10  
11  
12  
13  
14  
15  
16  
17  
18  
19  
20  
21  
22  
23  
24  
25  
26  
27  
28  
29  
30  
31  
32  
33  
34  
35  
36  
37  
38  
39  
40  
41  
42  
43  
44  
45  
46  
47  
48  
49  
50  
51  
52  
53  
54  
55  
56  
57  
58  
59  
60
19. World Health Organization, WHO. *Immunization in Practice: A Guide for Health Workers Who Give Vaccines. Module I: Vaccines and When to Give Them*. Geneva: Department of Vaccines and Biologicals, World Health Organization, 1984.
  20. Sarker AR, Akram R, Ali N, Chowdhury ZI, Sultana M. Coverage and Determinants of Full Immunization: Vaccination Coverage among Senegalese Children. *Medicina*, 2019; **55**(8), 480.
  21. Pradhan R, Wynter K, Fisher, J. Factors Associated with Pregnancy among Married Adolescents in Nepal: Secondary Analysis of the National Demographic and Health Surveys from 2001 to 2011. *Int J Env ResPub He*, 2018; **15**(2), 229
  22. Office of the United Nations High Commissioner for Human Rights, OHCHR. *Convention on the Rights of the Child*, Adopted and opened for signature, ratification and accession by General Assembly resolution 44/25 of 20 November 1989 entry into force 2 September 1990, in accordance with article 49, n. d.
  23. World Health Organization. WHO. World Immunization Week in Nepal: An anniversary of remembrance, 2016. Retrieved from <https://www.who.int/news-room/feature-stories/detail/world-immunization-week-in-nepal-an-anniversary-of-remembrance>
  24. United National Development Reports. Human Development Report 2019, 2019. Retrieved from <http://hdr.undp.org/en>
  25. Atteraya MS, Gnawali S, Song IH. Factors associated with intimate partner violence against married women in Nepal. *J Interpers Violence*, 2015; **30**(7), 1226-1246.
  26. Tam WW, Chan J, Lo KK, Lee A, Chan PK, Chan D, Nelson EAS. Parental attitudes and factors associated with varicella vaccination in preschool and schoolchildren in Hong Kong: a cross-sectional study. *Medicine*, 2015;**94**(36).

- 1  
2  
3 27. World Health Organization, WHO. The Expanded Programme on Immunization, 2013.  
4  
5 Retrieved from  
6  
7 [http://www.who.int/immunization/programmes\\_systems/supply\\_chain/benefits\\_of\\_immu](http://www.who.int/immunization/programmes_systems/supply_chain/benefits_of_immunization/en/)  
8 [nization/en/](http://www.who.int/immunization/programmes_systems/supply_chain/benefits_of_immunization/en/)  
9  
10  
11  
12 28. Lamichhane P, Harken T, Puri M, Darney PD, Blum M, Harper CC, Henderson JT. Sex-  
13  
14 selective abortion in Nepal: a qualitative study of health workers' perspectives. *Women's*  
15  
16 *Health Issues*, 2011; **21**(3): S37-S41.  
17  
18  
19 29. Bennett L, Dahal DR, Govindasamy. *Caste, ethnic, and regional identity in Nepal: further*  
20  
21 *analysis of the 2006 Nepal Demographic and Health Survey*. Population Division,  
22  
23 Ministry of Health and Population, Government of Nepal, 2008  
24  
25  
26  
27  
28  
29  
30  
31  
32  
33  
34  
35  
36  
37  
38  
39  
40  
41  
42  
43  
44  
45  
46  
47  
48  
49  
50  
51  
52  
53  
54  
55  
56  
57  
58  
59  
60



# BMJ Open

## Inequalities in Complete Childhood Immunization in Nepal: Results from a Population-based Cross-sectional Study

|                                 |                                                                                                                                                                                                                                                                                                         |
|---------------------------------|---------------------------------------------------------------------------------------------------------------------------------------------------------------------------------------------------------------------------------------------------------------------------------------------------------|
| Journal:                        | <i>BMJ Open</i>                                                                                                                                                                                                                                                                                         |
| Manuscript ID                   | bmjopen-2020-037646.R2                                                                                                                                                                                                                                                                                  |
| Article Type:                   | Original research                                                                                                                                                                                                                                                                                       |
| Date Submitted by the Author:   | 05-Aug-2020                                                                                                                                                                                                                                                                                             |
| Complete List of Authors:       | Song, In Han; Yonsei University, Graduate School of Social Welfare; Harvard University T H Chan School of Public Health, Department of Health Policy & Management<br>Palley, Elizabeth; Adelphi University, School of Social Work<br>Atteraya, Madhu; Keimyung University, Department of Social Welfare |
| <b>Primary Subject Heading</b>: | Global health                                                                                                                                                                                                                                                                                           |
| Secondary Subject Heading:      | Global health, Immunology (including allergy)                                                                                                                                                                                                                                                           |
| Keywords:                       | PUBLIC HEALTH, Paediatric infectious disease & immunisation < PAEDIATRICALS, Community child health < PAEDIATRICALS, Child protection < PAEDIATRICALS                                                                                                                                                   |
|                                 |                                                                                                                                                                                                                                                                                                         |

SCHOLARONE™  
Manuscripts



I, the Submitting Author has the right to grant and does grant on behalf of all authors of the Work (as defined in the below author licence), an exclusive licence and/or a non-exclusive licence for contributions from authors who are: i) UK Crown employees; ii) where BMJ has agreed a CC-BY licence shall apply, and/or iii) in accordance with the terms applicable for US Federal Government officers or employees acting as part of their official duties; on a worldwide, perpetual, irrevocable, royalty-free basis to BMJ Publishing Group Ltd ("BMJ") its licensees and where the relevant Journal is co-owned by BMJ to the co-owners of the Journal, to publish the Work in this journal and any other BMJ products and to exploit all rights, as set out in our [licence](#).

The Submitting Author accepts and understands that any supply made under these terms is made by BMJ to the Submitting Author unless you are acting as an employee on behalf of your employer or a postgraduate student of an affiliated institution which is paying any applicable article publishing charge ("APC") for Open Access articles. Where the Submitting Author wishes to make the Work available on an Open Access basis (and intends to pay the relevant APC), the terms of reuse of such Open Access shall be governed by a Creative Commons licence – details of these licences and which [Creative Commons](#) licence will apply to this Work are set out in our licence referred to above.

Other than as permitted in any relevant BMJ Author's Self Archiving Policies, I confirm this Work has not been accepted for publication elsewhere, is not being considered for publication elsewhere and does not duplicate material already published. I confirm all authors consent to publication of this Work and authorise the granting of this licence.

**Title Page****Inequalities in Complete Childhood Immunization in Nepal: Results from a Population-based Cross-sectional Study**

In Han Song, PhD  
Professor & Visiting Scientist  
Yonsei University, Korea & Harvard University, USA  
Graduate School of Social Welfare & T.H. Chan School of Public Health  
Email: [isong@yonsei.ac.kr](mailto:isong@yonsei.ac.kr)

Elizabeth Palley, PhD  
Professor  
School of Social Work  
Adelphi University, NY, USA  
Email: [palley@adelphi.edu](mailto:palley@adelphi.edu)

Madhu Sudhan Atteraya, PhD  
Assistant Professor  
Department of Social Welfare  
Keimyung University, Korea  
Phone: +82-53-580-5993  
Email: [atteraya@kmu.ac.kr](mailto:atteraya@kmu.ac.kr)

Key words - childhood complete immunization; inequalities; caste/ethnicity; Nepal

Word Count – 3334 (excluding abstract, Tables, references, and acknowledgement)

Reference Count - 29

## Inequalities in Complete Childhood Immunization in Nepal: Results from a Population-based Cross-sectional Study

### Abstract

**Objective** To investigate the effect of different aspects of inequality on childhood immunization rates in Nepal. The study hypothesized that social inequalities factors (e.g., gender of a child, age of mother, caste/ethnic affiliation, mother's socio-economic status, place of residence, and other structural barrier factors such as living in extreme poverty and distance to health facility) affect the likelihood of children being immunized.

**Design** Using gender of a child, age of mother, caste/ethnic affiliation, mother's socio-economic status, place of residence, and other structural barrier factors such as living in extreme poverty and distance to health facility as independent variables, we performed bivariate and multivariate logistic regression analyses.

**Setting** This study used data from the most recent nationally representative cross-sectional Nepal Demographic and Health Survey in 2016.

**Participants** The analysis reviewed data from 1025 children ages 12 to 23 months old

**Outcome measures** The main outcome variable was childhood immunization

**Results** Only 79.2% of children were fully immunized. The complete vaccination rate of ethnic/caste subpopulations ranged from 66.4% to 85.2%. Similarly, multivariate analysis revealed that children from the previously untouchable caste (OR = .58; CI = .33 – .99) and the Terai caste (OR=0.54; CI = .29 – .99) were less likely to be fully immunized than children from the high Hindu caste.

**Conclusion** Given Nepal's limited resources, we suggest that programs which target the families of children who are least likely to be fully immunized, specifically those who are not

only poor but in financial crises and “underprivileged” caste families, might be an effective strategy to improve Nepal’s childhood immunization rates.

**Keywords:** childhood complete immunization; inequalities; caste/ethnicity; Nepal

### Strengths and limitations of this study

- One of the strengths of the study is that it used a nationally representative sample incorporating all sections of socio-economic, demographic and geographic characteristics, and therefore, the findings are robust and generalizable nationwide.
- Another strength of the study is that the results are useful to help inform national policies for childhood immunization in Nepal.
- One limitation is the use of cross-sectional data and rely on the validity of the mother’s answers to questions about vaccine utilization since some mothers may have been unaware of different doses of vaccines that their children received.
- Another limitation is that the study excluded data on children who may have been vaccinated when they were over 23 months old.
- Next limitation could be communication issues between parents and health care service providers in the survey as well as personal and cultural barriers that affect the collection of the data.

### Introduction

Full immunization coverage is one of the important agendas for sustainable development goal (SDG 3). However, almost 20 million children under 5 are still not be fully immunized.

1  
2  
3 This is a particular problem in low income nations such as Nepal.<sup>1</sup> Full immunization for young  
4 children is an instrumental variable for child health and wellbeing which helps reduce infant and  
5 child morbidity and mortality rates as well as prevents the spread of infectious diseases.<sup>2,3</sup>  
6  
7

8  
9  
10 Based on WHO protocols, children are considered to be fully immunized or have complete  
11 immunization after receiving a dose of Bacillus Calmette-Geurin (BCG), three doses of  
12 diphtheria-tetanus-pertussis (DPT), three doses of oral polio, and a dose of MMR vaccination to  
13 protect them from mumps, measles, rubella, polio, and tetanus.<sup>4</sup> Due to international childhood  
14 immunization efforts, infant and child mortality rates have fallen throughout the world including  
15 in sub-Saharan Africa and South Asia.<sup>5</sup> However, within targeted countries, including Nepal,  
16 immunization rates and child mortality rates are unevenly distributed across subpopulations.<sup>3</sup> In  
17 this study, we sought to understand the specific challenges and the factors that impede or  
18 facilitate childhood immunization in Nepal.  
19  
20  
21  
22  
23  
24  
25  
26  
27  
28  
29

30  
31 Previous research has indicated that social exclusion affects access to health care,  
32 exacerbates health inequality, and reduces health care service utilization.<sup>2, 3, 6, 7, 8, 9, 10</sup> Previous  
33 research on childhood immunization coverage in South Asia has examined the effect of a child's  
34 gender, his/her family's level of wealth and education, regional inequalities, parental knowledge  
35 and attitudes about immunization, and issues related to mother's empowerment. In South Asia,  
36 numerous studies have demonstrated that individual factors (a child's gender), family factors  
37 (area of residence, household wealth, and parental education), demographic factors (religion and  
38 caste affiliation), and societal factors (health care access and community literacy level) are  
39 associated with child immunization rates.<sup>2, 3, 6, 7, 8, 9, 10</sup> The majority of immunization studies in  
40 India have relied on surveys conducted by the National Family Health Survey (NFHS) between  
41 1992/1993 and 2006 suggested that girls were less likely to be immunized than boys.<sup>11, 12, 13</sup>  
42  
43  
44  
45  
46  
47  
48  
49  
50  
51  
52  
53  
54  
55  
56  
57  
58  
59  
60

1  
2  
3 Studies also reported that children were more likely to be immunized if their parents had more  
4 knowledge about immunization, their mothers had more education, they were raised in an urban  
5 setting, and their families had more money.<sup>14, 15</sup>  
6  
7  
8  
9

10 In Nepal, the majority of research on immunization has emphasized evaluating factors that  
11 affect access to health care as well as the quality of service delivery, including the vaccination  
12 rates.<sup>6</sup> Previous research in Nepal has found that poverty, geographic location (difficult terrain),  
13 being from a low caste or indigenous population, traditional cultural attitudes, being female, and  
14 low levels of maternal education all reduce the likelihood that a child will be immunized.<sup>2, 6, 7, 10</sup>  
15 Previous research<sup>6</sup> found that children from indigenous and previously untouchable caste (e.g.,  
16 *Dalits*) were less likely to be immunized than High caste children. Terai caste and Muslim  
17 children were not included in the study analysis. Indeed, Terai caste and Terai Muslims are the  
18 most underprivileged and under representative communities in the Nepalese social structure.<sup>16, 17,</sup>  
19 In an attempt to build on this research and understand current challenges to immunization in  
20 Nepal, this study not only explored demographic information and many of the factors considered  
21 above but also examined structural barrier factors that do not exist outside of Nepal. The aim of  
22 the study is to examine whether a child's gender, maternal age, caste/ethnic affiliation, mother's  
23 socio-economic status, place of residence, extreme poverty, and distance to health facilities  
24 affect the likelihood of a child being immunized in Nepal.  
25  
26  
27  
28  
29  
30  
31  
32  
33  
34  
35  
36  
37  
38  
39  
40  
41  
42  
43

## 44 **Methods**

### 45 ***Data***

46  
47 We used data from the 2016 Nepal Demographic Health Survey (the 2016 NDHS), a  
48 nationally representative sample of Nepal. The data was collected by the MEASURE  
49 Demographic and Health Survey (DHS) project.<sup>16</sup> The DHS project has collected the most  
50  
51  
52  
53  
54  
55  
56  
57  
58  
59  
60

1  
2  
3 comprehensive health data available in developing countries, including Nepal. The data is  
4  
5 publicly available through the Ministry of Health and Population of Nepal, New Era Kathmandu,  
6  
7 and ICF International USA. The survey is conducted every five years with support from the US  
8  
9 Agency for International Development (USAID) through its mission in Nepal and was supported  
10  
11 by the Ministry of Health and Population of Nepal. We used data from the Children's Data  
12  
13 Section (i.e., Child Recode File) of the Nepal Demographic Health Survey the 2016 NDHS. The  
14  
15 data provides health information on every child who was born in the five years preceding the  
16  
17 survey. The survey also provides information about children who received specific vaccine  
18  
19 based on vaccination card and/or mother's report. We only analyzed data for children from 12-23  
20  
21 months (n=1025). We selected this data because most children are completely immunized by the  
22  
23 age of 24 months.<sup>18</sup>

### 24 25 26 27 28 *Dependent Variable*

29  
30  
31 As per the WHO recommendation, a child was considered to be fully immunized if s/he  
32  
33 received a BCG vaccine at birth or soon after; three doses each of DPT and polio vaccine at 6,  
34  
35 10, and 14 weeks of age; and the measles vaccine at 9 months or soon thereafter.<sup>19</sup> We  
36  
37 aggregated the values of a BCG vaccine, three DPT and polio vaccines, and a dose of measles.  
38  
39 A value of "1" was assigned for children who received all three vaccines and was considered to  
40  
41 be fully immunized; children who were either unvaccinated or only partially vaccinated were  
42  
43 grouped together and coded as "0." Similarly, those children who received complete doses of  
44  
45 DPT and polio vaccines were coded as 1 and those who were unvaccinated or only partially  
46  
47 vaccinated for DPT and polio were coded as "0." Those who received a measles vaccine were  
48  
49 coded as 1 and all others values were coded as 0. In further analysis, we did not consider BGG  
50  
51 vaccination because almost 98% children were BCG vaccinated.  
52  
53  
54  
55  
56  
57  
58  
59  
60



### ***Independent variable coding***

The individual level covariates included: gender of the child, age of the mother, mother's educational attainment, family wealth index, mother's age, and number of living children under the age of five. These demographic, biological, and socioeconomic characteristics were based on factors that had been previously shown to be associated with childhood immunization.<sup>3, 6, 8, 11, 14, 15, 20</sup> We included Nepali specific contextual factors, such as caste/ethnic affiliation, ecological and regional location of residence (urban/rural and provinces). Other variables (e.g., structural barrier factors for health care service utilization) we considered were distance to a health facility and immediate financial situation (e.g. money as a big problem to visit health care service, and distance to health care facility).

All independent variables in the study were categorical variable, except the number of children under the age of five. A boy was coded as "1" and a girl was coded as "2". The NDHS provides mother age groups in 5 year interval (15-49). We recoded creating a mother's age group into 4 categories as 15 to 19, 20 to 29, 30 to 39, and 40 to 49.

There are 125 registered caste/ethnic groups in Nepal and one's caste/ethnicity is determined by birth. Within such heterogeneity of caste/ethnic groupings, the NDHS provides 11 different categories of caste/ethnicity affiliation, which we further grouped into four categories based on previous studies<sup>21</sup> as high Hindu caste, previously untouchable caste (e.g., Dalits), indigenous (Newars and Janajati), and other Terai caste (i.e., Madeshi and Muslims). The NDHS provides mother's educational attainment as illiterate, primary school attainment, secondary school attainment, and higher education attainment. We recoded again and coded as "0" for those mother who have never attended any schooling, "1" for primary education completion, and "2" was coded for secondary and higher education attainment. The NDHS provides 5 categories of

1  
2  
3 wealth index based on household's cumulative living standard and it was recoded as poorest,  
4  
5 poor, middle, rich, and richest. .  
6

7  
8 Nepal has three distinct geographical regions (Mountain, Hill, and Terai) and we coded  
9  
10 geographical regions into three categories. The Mountain region includes areas with elevation of  
11  
12 3,000 meters above sea level to Mount Everest (elevation 8,848 meters), the tallest Mountain in  
13  
14 the world. The Hill region lies between elevations of 700 and 3,000 meters above sea level, and  
15  
16 the Terai region is relatively flat and borders of India. Similarly, cities and towns were grouped  
17  
18 into urban area which were coded as "1"; villages were grouped under the rural area which were  
19  
20 coded as "2".  
21  
22

23  
24 In 2015, according to the Constitution of Nepal 2015, seven provinces were formed as  
25  
26 Province 1, Province 2, Province 3, Province 4, Province 5, Province 6, and Province 7. The  
27  
28 formation of the provinces was based on the language and caste/ethnic diversity, although there  
29  
30 is no majority caste/ethnic population in any of these provinces. These provinces were coded as  
31  
32 categories variable: Province 1, Province 2, Province 3, Province 4, Province 5, Province 6, and  
33  
34 Province 7. We used Province 3 as a "reference category" because Kathmandu, the capital city of  
35  
36 Nepal, is in Province 3. We also included two factors that we predicted would be structural  
37  
38 barriers to accessing vaccines; affordability (money was reported to be as big problem) and  
39  
40 accessibility (distance to health facility). Those who responded that money was not a big  
41  
42 problem were coded as "0" and those who responded that money was not a big problem were  
43  
44 coded as "1". Similarly, those who reported distance to health care facility was not a big problem  
45  
46 was recoded as "0" and those who responded "big problem" was coded as "1".  
47  
48  
49  
50

### 51 *Data Analyses*

52  
53  
54  
55  
56  
57  
58  
59  
60

The statistical analyses were performed using the software SPSS for Windows (version 25). We first ran descriptive and bivariate statistical analyses. To identify factors that are significantly associated with complete childhood immunization, we ran multivariate logistic regressions. Variables which were significant in our univariate analyses were included in the multivariate logistic regression analyses. To determine the statistical significance, we used a p-value less than 0.05.

### ***Ethical Approval***

For the 2016 Nepal Demographic Health Survey (the 2016 NDHS), ethical approval was obtained from the Nepal Health Research Council, Kathmandu, Nepal, and ICF Macro Institutional Review Board, Maryland, USA.

### ***Patient and Public Involvement statement***

Patients and the public were not involved in the research.

## **Results**

Overall, 79.2% of the children were fully immunized while 97.7% of children had received a BCG vaccination, 88.6 % received full doses of Polio vaccines, 87.4% received total doses of DPT vaccines, and nearly 91% of the children had their measles vaccine (Table 1).

***Table 1. Childhood Immunization by the Vaccine Type***

| Vaccination         | A BCG vaccine | Three Polio vaccines | Three DPT vaccine | A Measles vaccine | Complete Immunization |
|---------------------|---------------|----------------------|-------------------|-------------------|-----------------------|
| % vaccinated        | 97.7          | 88.6                 | 87.4              | 91.1              | 79.2                  |
| Gender of the child |               |                      |                   |                   |                       |
| Male                | 98.2          | 88.4                 | 86.5              | 91.1              | 78.1                  |
| Female              | 96.9          | 88.8                 | 88.6              | 91.4              | 80.6                  |
| Age of the mother   |               |                      |                   |                   |                       |
| 15 - 19             | 98.3          | 89.3                 | 86.0              | 94.2              | 80.2                  |

## Childhood Complete Immunization in Nepal

|    |                                |      |      |      |      |      |
|----|--------------------------------|------|------|------|------|------|
| 1  |                                |      |      |      |      |      |
| 2  |                                |      |      |      |      |      |
| 3  | 20 - 29                        | 97.9 | 88.6 | 87.5 | 90.4 | 79.0 |
| 4  | 30 - 39                        | 96.5 | 88.3 | 87.7 | 93.6 | 80.1 |
| 5  | 40 - 49                        | 95.2 | 85.7 | 90.5 | 81.0 | 71.4 |
| 6  |                                |      |      |      |      |      |
| 7  | Caste/Ethnic Affiliation       |      |      |      |      |      |
| 8  | High Hindu Caste               | 99.7 | 91.1 | 92.5 | 96.1 | 85.2 |
| 9  | Previously Untouchables        | 97.0 | 88.1 | 87.5 | 88.6 | 74.9 |
| 10 | Indigenous                     | 97.5 | 90.4 | 89.8 | 95.0 | 84.8 |
| 11 | Terai Caste, Muslims           | 95.6 | 83.0 | 77.3 | 81.2 | 66.4 |
| 12 |                                |      |      |      |      |      |
| 13 | Mother's Education             |      |      |      |      |      |
| 14 | None                           | 96.7 | 84.4 | 83.8 | 84.1 | 70.8 |
| 15 | Primary                        | 97.1 | 89.4 | 87.0 | 91.3 | 77.3 |
| 16 | Secondary & Higher             | 98.4 | 90.7 | 89.7 | 95.3 | 84.9 |
| 17 | Wealth Status                  |      |      |      |      |      |
| 18 | Poorest                        | 98.0 | 85.8 | 88.2 | 92.5 | 77.6 |
| 19 | Poor                           | 97.0 | 88.7 | 87.8 | 91.3 | 80.0 |
| 20 | Middle                         | 97.8 | 86.5 | 83.4 | 86.5 | 74.0 |
| 21 | Richer                         | 98.6 | 93.3 | 89.0 | 94.7 | 84.6 |
| 22 | Richest                        | 96.3 | 89.9 | 89.9 | 90.8 | 81.7 |
| 23 |                                |      |      |      |      |      |
| 24 | Ecological Region              |      |      |      |      |      |
| 25 | Mountain                       | 98.9 | 80.5 | 85.1 | 94.3 | 72.4 |
| 26 | Hill                           | 98.8 | 92.5 | 93.2 | 96.0 | 86.5 |
| 27 | Terai                          | 96.5 | 86.4 | 82.9 | 86.6 | 74.2 |
| 28 |                                |      |      |      |      |      |
| 29 | Place of Residence             |      |      |      |      |      |
| 30 | Urban                          | 97.8 | 89.1 | 87.0 | 91.1 | 79.3 |
| 31 | Rural                          | 97.5 | 88.0 | 88.0 | 91.2 | 79.0 |
| 32 | Provinces                      |      |      |      |      |      |
| 33 | Province 1                     | 97.2 | 85.1 | 85.8 | 96.5 | 79.4 |
| 34 | Province 2                     | 96.0 | 82.5 | 77.8 | 80.8 | 65.7 |
| 35 | Province 3                     | 98.1 | 92.5 | 92.5 | 95.3 | 86.0 |
| 36 | Province 4                     | 100  | 96.7 | 94.3 | 97.6 | 91.9 |
| 37 | Province 5                     | 98.3 | 96.1 | 90.4 | 87.0 | 79.7 |
| 38 | Province 6                     | 97.9 | 86.1 | 84.7 | 94.4 | 77.1 |
| 39 | Province 7                     | 97.0 | 89.6 | 91.8 | 94.0 | 83.6 |
| 40 |                                |      |      |      |      |      |
| 41 | Money needed to visit a health |      |      |      |      |      |
| 42 | care facility                  |      |      |      |      |      |
| 43 | Not a big problem              | 98.6 | 91.1 | 93.5 | 96.2 | 86.8 |
| 44 | Big problem                    | 97.0 | 86.9 | 83.3 | 87.8 | 74.0 |
| 45 |                                |      |      |      |      |      |
| 46 | Distance to health facility    |      |      |      |      |      |
| 47 | Not a big problem              | 98.2 | 92.0 | 91.3 | 94.9 | 84.6 |
| 48 | Big problem                    | 97.3 | 86.5 | 95.1 | 86.0 | 75.9 |
| 49 |                                |      |      |      |      |      |

Note: SD = Standard Deviation

## Childhood Complete Immunization in Nepal

1  
2  
3 Table 2 presents the descriptive characteristics of the sample and the bivariate association  
4 between independent and dependent variables. Fifty-six percent of the children were boys and  
5 44% girls. Almost 30% of the children were from high Hindu caste families, 16.4 % were from  
6 the previously untouchable caste, 31.5 % were from indigenous families, and 22.3 % were from  
7 the Terai caste or were Muslim. Nearly 30% of mothers never had any formal schooling. Results  
8 from bivariate analyses indicated that caste/ethnic affiliation, mother's education, wealth status,  
9 ecological region, provinces, number of children under five, money to pay to get to a health care  
10 facility, and distance to health care facilities were significantly associated with complete  
11 childhood immunization. We also found that only 66.4% of Terai Caste and Muslim children  
12 were fully immunized whereas 82.5% of high Hindu caste children were fully immunized.  
13 Similarly, 65.7 % of children who live in Province 2 were fully immunized whereas almost 92%  
14 of children living in province 4 were fully immunized. (Table 2).  
15  
16  
17  
18  
19  
20  
21  
22  
23  
24  
25  
26  
27  
28  
29  
30  
31  
32  
33  
34  
35  
36  
37  
38  
39  
40  
41  
42  
43  
44  
45  
46  
47  
48  
49  
50  
51  
52  
53  
54  
55  
56  
57  
58  
59  
60

## Childhood Complete Immunization in Nepal

**Table 2.** Descriptive Characteristics of the Sample and Bivariate Association between Independent Variables and Complete Childhood Immunization (N=1025)

| Variables                | All Population |      | Three Polio vaccines |      | Three DPT vaccines |      | A Measles vaccine |      | Completely Immunized |      |
|--------------------------|----------------|------|----------------------|------|--------------------|------|-------------------|------|----------------------|------|
|                          | N.             | (%)  | yes (N)              | %    | yes (N)            | %    | yes (N)           | %    | yes (N)              | %    |
| Gender of the child      |                |      |                      |      |                    |      |                   |      |                      |      |
| Male                     | 570            | 55.6 | 504                  | 88.4 | 493                | 86.5 | 519               | 91.1 | 145                  | 78.1 |
| Female                   | 455            | 44.4 | 404                  | 88.8 | 403                | 88.6 | 415               | 91.4 | 366                  | 80.6 |
| Age of the mother        |                |      |                      |      |                    |      |                   |      |                      |      |
| 25 – 19                  | 121            | 11.8 | 108                  | 89.3 | 104                | 86.0 | 114               | 94.2 | 97                   | 80.2 |
| 20 - 29                  | 712            | 69.5 | 631                  | 88.6 | 623                | 87.5 | 643               | 90.4 | 562                  | 79.0 |
| 30 - 39                  | 171            | 16.7 | 151                  | 88.3 | 150                | 87.7 | 160               | 93.6 | 137                  | 80.1 |
| 40 – 49                  | 21             | 2.0  | 18                   | 85.7 | 19                 | 90.5 | 17                | 81.0 | 15                   | 71.4 |
| Caste/Ethnic Affiliation |                |      | **                   |      | ****               |      | ****              |      | ****                 |      |
| High Hindu Caste         | 305            | 29.8 | 278                  | 91.1 | 282                | 92.5 | 293               | 96.1 | 260                  | 82.5 |
| Previously Untouchables  | 168            | 16.4 | 148                  | 88.1 | 147                | 87.5 | 148               | 88.6 | 125                  | 74.9 |
| Indigenous               | 232            | 31.5 | 292                  | 90.4 | 290                | 89.8 | 307               | 95.0 | 274                  | 84.8 |
| Terai Caste, Muslims     | 299            | 22.3 | 190                  | 83.0 | 177                | 77.3 | 186               | 81.2 | 152                  | 66.4 |
| Mother's Education       |                |      | **                   |      | **                 |      | ****              |      | ****                 |      |
| None                     | 302            | 29.5 | 255                  | 84.4 | 253                | 83.9 | 253               | 84.1 | 213                  | 70.8 |
| Primary Education        | 207            | 20.2 | 185                  | 89.4 | 180                | 87.0 | 189               | 91.3 | 160                  | 77.3 |
| Secondary & Higher       | 516            | 50.3 | 468                  | 90.7 | 463                | 89.7 | 492               | 95.3 | 438                  | 84.9 |
| Wealth Status            |                |      |                      |      |                    |      | **                |      | *                    |      |
| Poorest                  | 254            | 24.8 | 218                  | 85.8 | 224                | 88.2 | 235               | 92.5 | 197                  | 77.6 |
| Poor                     | 230            | 22.4 | 204                  | 88.7 | 202                | 87.8 | 210               | 91.3 | 184                  | 80.0 |
| Middle                   | 223            | 21.8 | 193                  | 86.5 | 186                | 83.4 | 193               | 86.5 | 165                  | 74.0 |
| Richer                   | 209            | 20.4 | 195                  | 93.3 | 186                | 89.0 | 197               | 94.7 | 176                  | 84.6 |
| Richest                  | 109            | 10.6 | 98                   | 89.9 | 98                 | 89.9 | 99                | 90.8 | 89                   | 81.7 |
| Ecological Region        |                |      | ****                 |      | ****               |      | ****              |      | ****                 |      |
| Mountain                 | 87             | 8.5  | 70                   | 80.5 | 74                 | 85.1 | 82                | 94.3 | 63                   | 72.4 |
| Hill                     | 429            | 41.9 | 398                  | 92.8 | 400                | 93.2 | 412               | 96.0 | 371                  | 86.5 |
| Terai                    | 509            | 49.7 | 440                  | 86.4 | 422                | 82.9 | 440               | 86.6 | 377                  | 74.2 |

## Childhood Complete Immunization in Nepal

|                                    |            |      |            |      |              |      |               |      |               |      |
|------------------------------------|------------|------|------------|------|--------------|------|---------------|------|---------------|------|
| Place of Residence                 |            |      |            |      |              |      |               |      |               |      |
| Urban                              | 585        | 57.1 | 521        | 89.1 | 509          | 87.0 | 533           | 91.1 | 464           | 79.3 |
| Rural                              | 440        | 42.9 | 387        | 88.0 | 387          | 88.0 | 401           | 91.3 | 347           | 79.0 |
| Provinces                          |            |      | ***        |      | ****         |      | ****          |      | ****          |      |
| Province 1                         | 141        | 13.8 | 120        | 85.1 | 121          | 85.8 | 136           | 96.5 | 112           | 79.4 |
| Province 2                         | 198        | 19.3 | 163        | 82.3 | 154          | 77.8 | 160           | 80.8 | 130           | 65.7 |
| Province 3                         | 107        | 10.4 | 99         | 92.5 | 99           | 92.5 | 102           | 95.3 | 92            | 86.0 |
| Province 4                         | 123        | 12.0 | 119        | 96.7 | 116          | 94.3 | 120           | 97.6 | 113           | 91.9 |
| Province 5                         | 178        | 17.4 | 163        | 91.6 | 161          | 90.4 | 154           | 87.0 | 141           | 79.7 |
| Province 6                         | 144        | 14.0 | 124        | 86.1 | 122          | 84.7 | 136           | 94.4 | 111           | 77.1 |
| Province 7                         | 134        | 13.1 | 120        | 89.6 | 123          | 91.8 | 126           | 94.0 | 112           | 83.6 |
| Number of children under 5 (M; SD) | 1.61; .902 |      | 2.12; 1.38 |      | 2.10; 1.38** |      | 2.09; 1.38*** |      | 2.05; 1.36*** |      |
|                                    |            |      | **         |      | *            |      | *             |      | *             |      |
| Money needed to visit              |            |      | **         |      | ****         |      | ****          |      | ****          |      |
| Not a big problem                  | 416        | 40.6 | 379        | 91.1 | 389          | 93.5 | 400           | 96.2 | 361           | 86.8 |
| Big problem                        | 609        | 59.4 | 529        | 98.9 | 507          | 83.3 | 534           | 87.8 | 450           | 74.0 |
| Distance to health facility        |            |      | **         |      | ***          |      | ***           |      | ****          |      |
| Not a big problem                  | 389        | 38.0 | 358        | 92.0 | 355          | 91.3 | 369           | 94.9 | 329           | 84.6 |
| Big problem                        | 636        | 62.0 | 550        | 86.5 | 541          | 85.1 | 565           | 89.0 | 482           | 75.9 |

Note: N. = Number

\* $p \leq .10$ . \*\* $p \leq .05$ . \*\*\* $p \leq .01$ . \*\*\*\* $p \leq .001$ .

1  
2  
3 Results from the multivariate analysis showed that children from the previously untouchable  
4 caste (OR = .58; CI = .33 – .99) and the Terai caste (OR=0.54; CI = .29 – .99) were less likely to  
5 be fully immunized than children from the high Hindu caste. Similarly, children from the Terai  
6  
7  
8  
9  
10  
11  
12  
13  
14  
15  
16  
17  
18  
19  
20  
21  
22  
23  
24  
25  
26  
27  
28  
29  
30  
31  
32  
33  
34  
35  
36  
37  
38  
39  
40  
41  
42  
43  
44  
45  
46  
47  
48  
49  
50  
51  
52  
53  
54  
55  
56  
57  
58  
59  
60

Children living in Hill region were more likely to be fully immunized and more likely to get complete doses of polio vaccines and DPT vaccines than children living in Mountain region. Although statistical significance was weaker, more abundant wealth status was correlated with a child's likelihood of being vaccinated, such as a total dose of polio, a measles vaccine, and overall full immunization. Similarly, children from mothers reporting immediate financial problems (e.g., money is a big problem) were less likely to be fully immunized, including a complete dose of DPT and measles, than their counterpart (See Table 3).



## Childhood Complete Immunization in Nepal

**Table 3.** Logistic Regression Analysis for Complete Immunization in Nepal.

| Variables                       | Three Polio vaccines |             | Three DPT vaccines |             | A Measles vaccine |             | Complete immunization |             |
|---------------------------------|----------------------|-------------|--------------------|-------------|-------------------|-------------|-----------------------|-------------|
|                                 | OR                   | 95% CI      | OR                 | 95% CI      | OR                | 95% CI      | OR                    | 95% CI      |
| <b>Caste/Ethnic Affiliation</b> |                      |             |                    |             |                   |             |                       |             |
| High Hindu Caste (ref.)         | 1.00                 |             | 1.00               |             | 1.00              |             | 1.00                  |             |
| Untouchables                    | .61                  | .30 – 1.24  | .57                | .28 – 1.17  | .54               | .22 – 1.30  | .58**                 | .33 – .99   |
| Indigenous                      | .79                  | .42 – 1.48  | .72                | .38 – 1.39  | .96               | .40 – 2.34  | .96                   | .58 – 1.59  |
| Terai Caste, Muslims            | .48*                 | .22 – 1.05  | .36**              | .16 – .79   | .56               | .22 – 1.44  | .54**                 | .29 – .99   |
| <b>Mother's Education</b>       |                      |             |                    |             |                   |             |                       |             |
| None (ref.)                     | 1.00                 |             | 1.00               |             | 1.00              |             | 1.00                  |             |
| Primary                         | 1.24                 | .70 – 2.19  | .95                | .55 – 1.62  | 1.77*             | .96 – 3.28  | 1.13                  | .73 – 1.75  |
| Secondary & Higher              | 1.07                 | .64 – 1.81  | .78                | .47 – 1.30  | 1.95**            | 1.04 – 3.63 | 1.23                  | .81 – 1.86  |
| <b>Wealth Status</b>            |                      |             |                    |             |                   |             |                       |             |
| Poorest (ref.)                  | 1.00                 |             | 1.00               |             | 1.00              |             | 1.00                  |             |
| Poor                            | 1.56                 | .84 – 2.90  | 1.14               | .60 – 2.16  | 1.45              | .65 – 3.21  | 1.32                  | .80 – 2.18  |
| Middle                          | 1.54                 | .78 – 3.05  | 1.06               | .53 – 2.08  | 1.12              | .49 – 2.54  | 1.16                  | .67 – 2.00  |
| Richer                          | 2.70*                | 1.20 – 6.09 | 1.25               | .59 – 2.62  | 2.44*             | .93 – 6.39  | 1.71*                 | .93 – 3.15  |
| Richest                         | 1.44                 | .57 – 3.58  | 1.19               | .48 – 2.99  | 1.03              | .36 – 2.94  | 1.19                  | .57 – 2.45  |
| <b>Ecological Region</b>        |                      |             |                    |             |                   |             |                       |             |
| Mountain (ref.)                 | 1.00                 |             | 1.00               |             | 1.00              |             | 1.00                  |             |
| Hill                            | 2.51**               | 1.23 – 5.09 | 2.72**             | 1.24 – 5.99 | 1.25              | .41 – 3.76  | 2.14**                | 1.17 – 3.90 |
| Terai                           | 1.32                 | .56 – 3.07  | .76                | .31 – 1.88  | .58               | .16 – 2.10  | 1.27                  | .62 – 2.60  |
| <b>Provinces</b>                |                      |             |                    |             |                   |             |                       |             |
| Province 3 (ref.)               | 1.00                 |             | 1.00               |             | 1.00              |             | 1.00                  |             |
| Province 1                      | .57                  | .22 – 1.43  | .99                | .38 – 2.59  | 2.04              | .51 – 8.15  | .83                   | .39 – 1.73  |
| Province2                       | .67                  | .23 – 1.94  | 1.31               | .45 – 3.74  | .72               | .20 – 2.64  | .75                   | .32 – 1.72  |
| Province 4                      | 1.95                 | .55 – 6.90  | 1.15               | .38 – 3.43  | 1.66              | .37 – 7.49  | 1.62                  | .67 – 3.89  |
| Province 5                      | 1.10                 | .39 – 3.05  | 2.02               | .71 – 5.78  | .54               | .16 – 1.84  | .91                   | .42 – 1.98  |
| Province 6                      | .55                  | .21 – 1.40  | .39*               | .15 – 1.09  | 1.02              | .29 – 3.56  | .65                   | .31 – 1.36  |
| Province 7                      | .94                  | .34 – 2.54  | 1.67               | .59 – 4.74  | 1.28              | .36 – 4.55  | 1.26                  | .57 – 2.77  |
| Number of children under 5      | 1.15                 | .92 – 1.43  | .98                | .80 – 1.19  | .97               | .78 – 1.21  | .96                   | .81 – 1.44  |
| Money needed to visit           |                      |             |                    |             |                   |             |                       |             |

Childhood Complete Immunization in Nepal

|                             |        |            |        |            |        |            |        |            |
|-----------------------------|--------|------------|--------|------------|--------|------------|--------|------------|
| Not a big problem           | 1.00   |            | 1.00   |            | 1.00   |            | 1.00   |            |
| Big problem *               | 1.14   | .69 – 1.88 | .47*** | .28 - .81  | .55*   | .28 – 1.09 | .66**  | .44 – 1.00 |
| Distance to health facility |        |            |        |            |        |            |        |            |
| Not a big problem           | 1.00   |            | 1.00   |            | 1.00   |            | 1.00   |            |
| Big problem                 | .65    | .39 – 1.09 | .81    | .49 – 1.32 | .63    | .34 – 1.18 | .81    | .54 – 1.22 |
| Overall model $\chi^2$      | 48.856 |            | 71.466 |            | 85.663 |            | 80.948 |            |
| Cox & Snell R <sup>2</sup>  | .047   |            | .067   |            | .080   |            | .076   |            |
| -2 LL                       | 679.09 |            | 704.31 |            | 525.88 |            | 966.20 |            |
|                             | 3      |            | 1      |            | 3      |            | 5      |            |

\*p ≤ .10. \*\*p ≤ .05. \*\*\*p ≤ .01. \*\*\*\*p ≤ .001.

For peer review only

## Discussion

Article 20 of the United Nations Convention on the Rights of the Child (UNCRC) declares that no child should be left behind or deprived of his or her rights to access health care, including the right to be fully immunized.<sup>22</sup> In line with the UNCRC, Nepal began offering free vaccines to vaccinate its children fully. Despite the progress on immunization of one-year-old children, complete childhood immunization has still remained a challenge in Nepal.<sup>23</sup>

The government of Nepal has committed to achieve UN Sustainable Development Goal (Goal 3) and sought to increase the childhood vaccination rates through its National Immunization Program (NIP) by providing childhood immunization to all sections of the population. In order to ensure that Nepal can successfully implement programs designed to increase childhood vaccination rates, it is essential to understand who is and who is not being vaccinated. We highlight some of the key findings of this study.

The findings of this analysis are consistent with previous research and indicate that family financial problems (acute poverty; e.g. the money to visit health facility) as well as being a member of a low or underprivileged caste all affect the likelihood that a child will or will not be immunized. The fact is that Nepal is one of the lowest income countries in the world with a Human Development Index of 0.58 ranking 147<sup>th</sup> out of 187 countries with about 35.4% of people living in absolute poverty (on less than \$3.19 (US) per day).<sup>24</sup> In 2011, the average mortality rate in Nepal for children under five was 68 per 1,000, much higher for previously untouchable caste (Dalits), 90 per 1000.<sup>16</sup> The finding of the study further supports the Nepal's socio-economic and geographical disparities create challenges to increasing its childhood immunization rates. Despite access to free vaccines throughout the country, intersection of acute

1  
2  
3 poverty and belonging to socially excluded caste/ethnic groups still makes it less likely to be  
4  
5 fully vaccinated by age 2.  
6

7  
8 Notwithstanding, the abolishment of the caste system in 1990 in Nepal's Constitution, its  
9  
10 legacy is apparent and the caste/ethnic-based social structure and hierarchy is still intact.  
11  
12 Previous studies have documented that the caste/ethnicity based social exclusion is deeply rooted  
13  
14 in Nepalese social structure, specifically people belonging to the untouchable caste as well as  
15  
16 belonging to Terai caste (including Madeshi and Muslims) face broad-based discrimination and  
17  
18 are socially excluded from the power structures in society.<sup>17</sup> As consequences of such social  
19  
20 exclusion, they are more likely to experience other forms of disadvantages such as living in  
21  
22 poverty and exposure of domestic violence.<sup>25</sup> Consistent with this social context, children  
23  
24 belonging to previously untouchable and Terai caste are less likely to be fully immunized than  
25  
26 other children.  
27  
28  
29

30  
31 Mothers with at least a secondary education were more likely to vaccinate their children.<sup>26</sup> This  
32  
33 finding is consistent in the case of measles vaccination in Nepal. However, that was not true for  
34  
35 other vaccines. The measles vaccine has to be completed between 9 and 12 months, whereas other  
36  
37 vaccines are usually done earlier. Likewise, household wealth status itself was not a strong  
38  
39 statistically significant predictor for childhood immunization. However, acute poverty (e.g.,  
40  
41 families which lack the money needed to visit a health care facility) is a significant barrier for  
42  
43 complete immunization. This is likely because the government has provided free vaccines in  
44  
45 Nepal since the inception of the Expanded Program on Immunization (EPI) in 1979.<sup>27</sup> This  
46  
47 suggests that though in many places in Nepal vaccines are readily available in health care centers,  
48  
49 acute poverty affects some women's ability to access to these health care centers. Mothers who  
50  
51 reported 'money as a big problem' to visit health care facilities were less likely to fully immunize  
52  
53  
54  
55  
56  
57  
58  
59  
60

1  
2  
3 their children. Nepal currently provides some financial incentives to mothers who give birth in  
4 hospitals or health centers. We recommend that this program be expanded to offer financial  
5 incentives to mothers who immunize their children in an effort to further reduce financial barriers  
6 to immunization.  
7  
8  
9  
10  
11  
12

13 We found that there are no gender differences between children who were fully immunized  
14 in Nepal. This finding is inconsistent with the previous studies that were conducted in South  
15 Asian context, especially India<sup>11, 12, 13</sup> However, there is a sex ratio imbalance in the overall  
16 population; 44% of children were girls, and 56% were boys. This indicates the male preference  
17 in Nepalese societies and the possibility of sex-selective abortion.<sup>28</sup> Interestingly, this sex  
18 preference does not seem to have influenced childhood immunization rates in Nepal. Further  
19 inquiry is needed to understand why.  
20  
21  
22  
23  
24  
25  
26  
27  
28  
29

30 We found that children living in the Hill region were more likely to be fully vaccinated than  
31 other subpopulations. The people in the Hill region belong to the top and the bottom of the caste  
32 system, and they brought the tradition of caste-based social structure. Such tradition of social  
33 groupings included the Brahmans (priests, teachers, and scholars), the Kshatriyas (kings and  
34 warriors), the Vaishyas (traders and businesspeople, or indigenous people), and the Shudra  
35 (untouchables or occupational castes or Dalits). The majority of people who live in the Hill  
36 region are from high Hindu caste backgrounds, and this population has a more significant  
37 influence on linguistic, socio-political, and cultural aspects in Nepal.<sup>29</sup>  
38  
39  
40  
41  
42  
43  
44  
45  
46  
47

### 48 **Recommendations**

49

50 The study explored social inequalities in Nepal, such as belonging to the underprivileged  
51 caste/ethnic group, living in acute poverty, and geographical disparities predicted to impede or  
52 facilitate childhood immunization for Nepalese children. Based on the study findings, we  
53  
54  
55  
56  
57  
58  
59  
60

1  
2  
3 recommend that it is essential to reduce deep-rooted social inequalities in order to effectively  
4 deliver essential social and health services, including childhood immunization. One way to do  
5 this is to improve social inclusion and to provide welfare programs, particularly for socially  
6 underprivileged caste/ethnic populations. We also recommend providing financial incentives to  
7 families that immunize their children. Such practices would support UN SDG 3, Article 20 of  
8 the United Nations Convention on the Rights, and Rights to Health Care which is also mandated  
9 by Article 35 of the 2015 Nepalese Constitution.  
10  
11  
12  
13  
14  
15  
16  
17  
18

### 19 **Conclusions**

20  
21 Each country has their own issues that limit access to health and welfare services. In  
22 Nepal, we found that children belonging to the underprivileged caste/ethnic groups and those  
23 whose mothers reported being in a financial crisis situation (e.g., money is a big problem to visit  
24 health care facility) were the least likely to be fully immunized. We recommend working to  
25 reduce deep seated social inequalities in Nepal that are correlated with children being less likely  
26 to be vaccinated. Nepal needs to do more than legislate to end the caste system (which has been  
27 done) but also needs to enforce such legislation. Another way to improve access to childhood  
28 vaccines would be to increase educational opportunities for girls. Lastly, and perhaps the most  
29 easily accomplished, more systematic vaccination programs such as community based education  
30 and financial incentives to vaccinate children could be designed to specifically target socially  
31 excluded children.  
32  
33  
34  
35  
36  
37  
38  
39  
40  
41  
42  
43  
44  
45  
46  
47

### 48 **Acknowledgment**

- 49  
50 a. Contributorship statement: All authors have substantially contributed to this manuscript.  
51  
52 IHS designed the manuscript, MSA prepared the dataset and conducted the statistical  
53 analysis under the supervision of IHS and EP. MSA prepared the initial draft of the  
54  
55  
56  
57  
58  
59  
60

1  
2  
3 paper. IHS and EP revised the paper and contributed to preparing the final draft for the  
4  
5 submission.  
6

7  
8 b. Competing interests: None declared.  
9

10 c. Funding: None.  
11

12 d. Data sharing statement: Data are available upon request.  
13  
14  
15  
16  
17

## 18 References

- 19  
20 1. UNICEF and WHO. Progress and Challenges with Achieving Universal Immunization  
21 Coverage, 2019. Retrieved from:  
22  
23 [24 https://www.who.int/immunization/monitoring\\_surveillance/who-immuniz.pdf?ua=1](https://www.who.int/immunization/monitoring_surveillance/who-immuniz.pdf?ua=1)  
25  
26  
27 2. Kc A, Nelin V, Raaijmakers H., Kim HJ, Singh C, Målqvist M. Increased immunization  
28 coverage addresses the equity gap in Nepal. *Bull. World Health Organ* 2017; **95**(4): 261-  
29 269  
30  
31  
32  
33 3. Bhandari P, Shrestha SS, Ghimire DJ. Sociocultural and geographical disparities in child  
34 immunization in Nepal. *Asia Pac Popul J*, 2007; **22**(1): 43.  
35  
36  
37 4. Jamison DT, Breman JG, Measham AR., Alleyne G, Claeson M, Evans DB, ...  
38 Musgrove P. (Eds.). *Disease control priorities in developing countries*. The World Bank,  
39 2006.  
40  
41  
42  
43  
44 5. Liu L, Oza S, Hogan D, Perin J, Rudan I, Lawn JE, ... Black RE. Global, regional, and  
45 national causes of child mortality in 2000–13, with projections to inform post-2015  
46 priorities: an updated systematic analysis. *Lancet*, 2015; **385**(9966): 430-440.  
47  
48  
49  
50  
51 6. Devkota S, Butler C. Caste-ethnic disparity in vaccine use among 0-to 5-year-old  
52 children in Nepal: a decomposition analysis. *Int J Public Health*, 2016; **61**(6): 693-699.  
53  
54  
55  
56  
57  
58  
59  
60

- 1  
2  
3 7. Devkota S, Panda B. Childhood immunization and access to health care: evidence from  
4  
5 Nepal. *Asia Pac J Public Health*, 2016; **28**(2): 167-177.  
6
- 7  
8 8. Joe W. Intersectional inequalities in immunization in India, 1992–93 to 2005–06: a  
9  
10 progress assessment. *Health Policy Plann*, 2014; **30**(4): 407-422.  
11
- 12  
13 9. Marmot M. Social determinants of health inequalities. *Lancet*, 2005; **365**(9464): 1099-  
14  
15 1104.  
16
- 17  
18 10. Pandey S, Lee H N. Determinants of child immunization in Nepal: The role of women's  
19  
20 empowerment. *Health Educ J*, 2012; **71**(6): 642-653.  
21
- 22  
23 11. Corsi DJ, Bassani DG, Kumar R, Awasthi S, Jotkar R, Kaur N, Jha P. Gender inequity  
24  
25 and age-appropriate immunization coverage in India from 1992 to 2006. *BMC Int Health  
26  
27 Hum Rights*, 2009; **9**(1): S3.  
28
- 29  
30 12. Prusty RK, Kumar A. Socioeconomic dynamics of gender disparity in childhood  
31  
32 immunization in India, 1992–2006. *PloS One*, 2014; **9**(8): e104598.  
33
- 34  
35 13. Singh PK. Trends in child immunization across geographical regions in India: focus on  
36  
37 urban-rural and gender differentials. *PloS One*, 2013; **8**(9): e73102.  
38
- 39  
40 14. Jheeta M, Newell J. Childhood vaccination in Africa and Asia: the effects of parents'  
41  
42 knowledge and attitudes. *Bull World Health Organ*, 2008; **86**: 419-419A.  
43
- 44  
45 15. Subhani S, Yaseen R, Khan MA, Jeelani G, Fatima R. Impact of mother's education on  
46  
47 child immunization: a comparative study of India and Pakistan. *IJFE* 2015; **3**: 51Á4.  
48
- 49  
50 16. Ministry of Health and Population (MOHP) [Nepal], New ERA, and ICF International  
51  
52 Inc. Nepal Demographic and Health Survey 2011. Kathmandu, Nepal: Ministry of Health  
53  
54 and Population, New ERA, and ICF International, Calverton, Maryland, 2012.  
55  
56  
57  
58  
59  
60



## Childhood Complete Immunization in Nepal

17. Dahal DR. The'Madhsi'People: Issues and Challenges of Democracy in the Nepal Terai. *Local democracy in south Asia: Microprocesses of democratization in Nepal and its neighbours, 1*, 128, 2008
18. Anand S, Bärnighausen T. Health workers and vaccination coverage in developing countries: an econometric analysis. *Lancet*, 2007; **369**(9569), 1277-1285.
19. World Health Organization, WHO. *Immunization in Practice: A Guide for Health Workers Who Give Vaccines. Module I: Vaccines and When to Give Them*. Geneva: Department of Vaccines and Biologicals, World Health Organization, 1984.
20. Sarker AR, Akram R, Ali N, Chowdhury ZI, Sultana M. Coverage and Determinants of Full Immunization: Vaccination Coverage among Senegalese Children. *Medicina*, 2019; **55**(8), 480.
21. Pradhan R, Wynter K, Fisher, J. Factors Associated with Pregnancy among Married Adolescents in Nepal: Secondary Analysis of the National Demographic and Health Surveys from 2001 to 2011. *Int J Env ResPub He*, 2018; **15**(2), 229
22. Office of the United Nations High Commissioner for Human Rights, OHCHR. *Convention on the Rights of the Child*, Adopted and opened for signature, ratification and accession by General Assembly resolution 44/25 of 20 November 1989 entry into force 2 September 1990, in accordance with article 49, n. d.
23. World Health Organization. WHO. World Immunization Week in Nepal: An anniversary of remembrance, 2016. Retrieved from <https://www.who.int/news-room/feature-stories/detail/world-immunization-week-in-nepal-an-anniversary-of-remembrance>
24. United National Development Reports. Human Development Report 2019, 2019. Retrieved from <http://hdr.undp.org/en>

- 1  
2  
3 25. Atteraya MS, Gnawali S, Song IH. Factors associated with intimate partner violence  
4 against married women in Nepal. *J Interpers Violence*, 2015; **30**(7), 1226-1246.  
5  
6  
7  
8 26. Tam WW, Chan J, Lo KK, Lee A, Chan PK, Chan D, Nelson EAS. Parental attitudes and  
9 factors associated with varicella vaccination in preschool and schoolchildren in Hong  
10 Kong: a cross-sectional study. *Medicine*, 2015;**94**(36).  
11  
12  
13  
14  
15 27. World Health Organization, WHO. The Expanded Programme on Immunization, 2013.  
16 Retrieved from  
17 [http://www.who.int/immunization/programmes\\_systems/supply\\_chain/benefits\\_of\\_immu](http://www.who.int/immunization/programmes_systems/supply_chain/benefits_of_immunization/en/)  
18 [nization/en/](http://www.who.int/immunization/programmes_systems/supply_chain/benefits_of_immunization/en/)  
19  
20  
21  
22  
23  
24 28. Lamichhane P, Harken T, Puri M, Darney PD, Blum M, Harper CC, Henderson JT. Sex-  
25 selective abortion in Nepal: a qualitative study of health workers' perspectives. *Women's*  
26 *Health Issues*, 2011; **21**(3): S37-S41.  
27  
28  
29  
30  
31 29. Bennett L, Dahal DR, Govindasamy. *Caste, ethnic, and regional identity in Nepal: further*  
32 *analysis of the 2006 Nepal Demographic and Health Survey*. Population Division,  
33 Ministry of Health and Population, Government of Nepal, 2008  
34  
35  
36  
37  
38  
39  
40  
41  
42  
43  
44  
45  
46  
47  
48  
49  
50  
51  
52  
53  
54  
55  
56  
57  
58  
59  
60

**STROBE 2007 (v4) Statement—Checklist of items that should be included in reports of *cross-sectional studies***

**Manuscript: *Inequalities in Complete Childhood Immunization in Nepal: Results from a Population-based Cross-sectional Study***

**ID: bmjopen-2020-037646.R2**

| Section/Topic                | Item # | Recommendation                                                                                                                                                                       | Reported on page # |
|------------------------------|--------|--------------------------------------------------------------------------------------------------------------------------------------------------------------------------------------|--------------------|
| <b>Title and abstract</b>    | 1      | (a) Indicate the study's design with a commonly used term in the title or the abstract                                                                                               | 2                  |
|                              |        | (b) Provide in the abstract an informative and balanced summary of what was done and what was found                                                                                  | 2                  |
| <b>Introduction</b>          |        |                                                                                                                                                                                      |                    |
| Background/rationale         | 2      | Explain the scientific background and rationale for the investigation being reported                                                                                                 | 3, 4               |
| Objectives                   | 3      | State specific objectives, including any prespecified hypotheses                                                                                                                     | 5                  |
| <b>Methods</b>               |        |                                                                                                                                                                                      |                    |
| Study design                 | 4      | Present key elements of study design early in the paper                                                                                                                              | 2, 9               |
| Setting                      | 5      | Describe the setting, locations, and relevant dates, including periods of recruitment, exposure, follow-up, and data collection                                                      | 5, 6, 7, 8         |
| Participants                 | 6      | (a) Give the eligibility criteria, and the sources and methods of selection of participants                                                                                          | 6                  |
| Variables                    | 7      | Clearly define all outcomes, exposures, predictors, potential confounders, and effect modifiers. Give diagnostic criteria, if applicable                                             | 6, 7, 8            |
| Data sources/<br>measurement | 8*     | For each variable of interest, give sources of data and details of methods of assessment (measurement). Describe comparability of assessment methods if there is more than one group | 5, 6               |
| Bias                         | 9      | Describe any efforts to address potential sources of bias                                                                                                                            | n/a                |
| Study size                   | 10     | Explain how the study size was arrived at                                                                                                                                            | 6                  |
| Quantitative variables       | 11     | Explain how quantitative variables were handled in the analyses. If applicable, describe which groupings were chosen and why                                                         | 6, 7, 8            |
| Statistical methods          | 12     | (a) Describe all statistical methods, including those used to control for confounding                                                                                                | 6, 7, 8            |
|                              |        | (b) Describe any methods used to examine subgroups and interactions                                                                                                                  | n/a                |
|                              |        | (c) Explain how missing data were addressed                                                                                                                                          | n/a                |
|                              |        | (d) If applicable, describe analytical methods taking account of sampling strategy                                                                                                   | n/a                |

|                          |     |                                                                                                                                                                                                              |                   |
|--------------------------|-----|--------------------------------------------------------------------------------------------------------------------------------------------------------------------------------------------------------------|-------------------|
|                          |     | (e) Describe any sensitivity analyses                                                                                                                                                                        | n/a               |
| <b>Results</b>           |     |                                                                                                                                                                                                              |                   |
| Participants             | 13* | (a) Report numbers of individuals at each stage of study—eg numbers potentially eligible, examined for eligibility, confirmed eligible, included in the study, completing follow-up, and analysed            | n/a               |
|                          |     | (b) Give reasons for non-participation at each stage                                                                                                                                                         | n/a               |
|                          |     | (c) Consider use of a flow diagram                                                                                                                                                                           | n/a               |
| Descriptive data         | 14* | (a) Give characteristics of study participants (eg demographic, clinical, social) and information on exposures and potential confounders                                                                     | 9, 10, 11, 12, 13 |
|                          |     | (b) Indicate number of participants with missing data for each variable of interest                                                                                                                          | n/a               |
| Outcome data             | 15* | Report numbers of outcome events or summary measures                                                                                                                                                         |                   |
| Main results             | 16  | (a) Give unadjusted estimates and, if applicable, confounder-adjusted estimates and their precision (eg, 95% confidence interval). Make clear which confounders were adjusted for and why they were included | 14, 15, 16        |
|                          |     | (b) Report category boundaries when continuous variables were categorized                                                                                                                                    | n/a               |
|                          |     | (c) If relevant, consider translating estimates of relative risk into absolute risk for a meaningful time period                                                                                             | n/a               |
| Other analyses           | 17  | Report other analyses done—eg analyses of subgroups and interactions, and sensitivity analyses                                                                                                               | n/a               |
| <b>Discussion</b>        |     |                                                                                                                                                                                                              |                   |
| Key results              | 18  | Summarise key results with reference to study objectives                                                                                                                                                     | 17, 18, 19        |
| Limitations              | 19  | Discuss limitations of the study, taking into account sources of potential bias or imprecision. Discuss both direction and magnitude of any potential bias                                                   | 3,                |
| Interpretation           | 20  | Give a cautious overall interpretation of results considering objectives, limitations, multiplicity of analyses, results from similar studies, and other relevant evidence                                   | 3, 17, 18, 19, 20 |
| Generalisability         | 21  | Discuss the generalisability (external validity) of the study results                                                                                                                                        | 3                 |
| <b>Other information</b> |     |                                                                                                                                                                                                              |                   |
| Funding                  | 22  | Give the source of funding and the role of the funders for the present study and, if applicable, for the original study on which the present article is based                                                | n/a               |

\*Give information separately for cases and controls in case-control studies and, if applicable, for exposed and unexposed groups in cohort and cross-sectional studies.

**Note:** An Explanation and Elaboration article discusses each checklist item and gives methodological background and published examples of transparent reporting. The STROBE checklist is best used in conjunction with this article (freely available on the Web sites of PLoS Medicine at <http://www.plosmedicine.org/>, Annals of Internal Medicine at <http://www.annals.org/>, and Epidemiology at <http://www.epidem.com/>). Information on the STROBE Initiative is available at [www.strobe-statement.org](http://www.strobe-statement.org).
